# Supplementary material for: Construction and Analysis of lncRNA-Mediated ceRNA Network in Nasopharyngeal Carcinoma Based on Weighted Correlation Network Analysis
Source: PubMed Central journal article supplement (PMC7569441; doi:10.1155/2020/1468980), 2020-10-10
Supplement: 1468980.f1.pdf [file 1468980.f1.pdf]

Figure S1

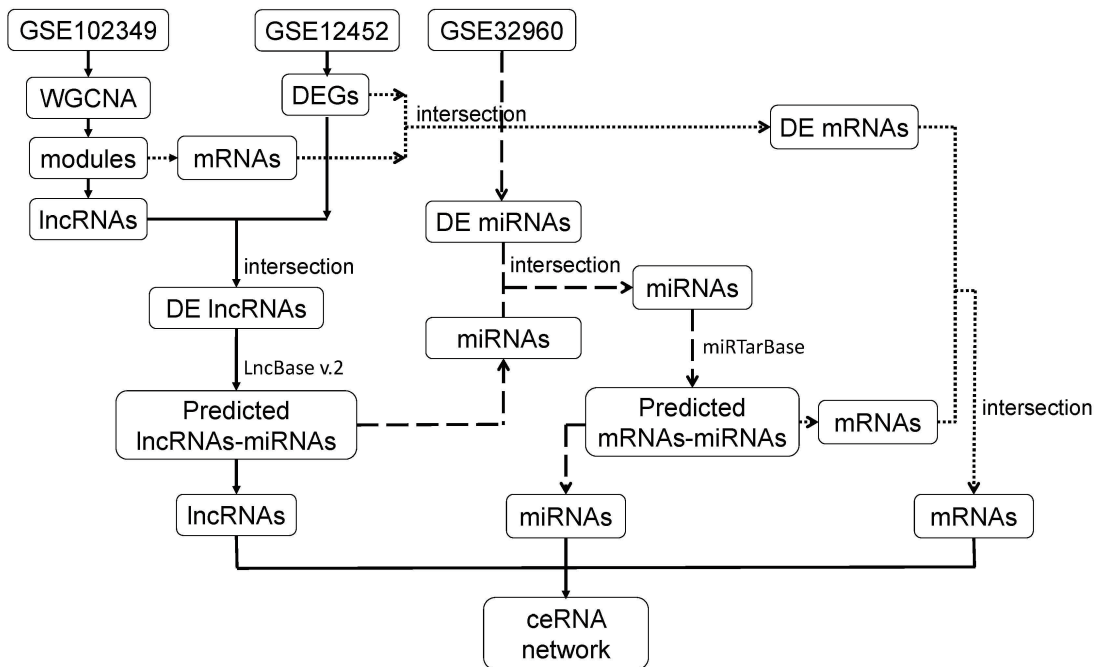



Figure S3

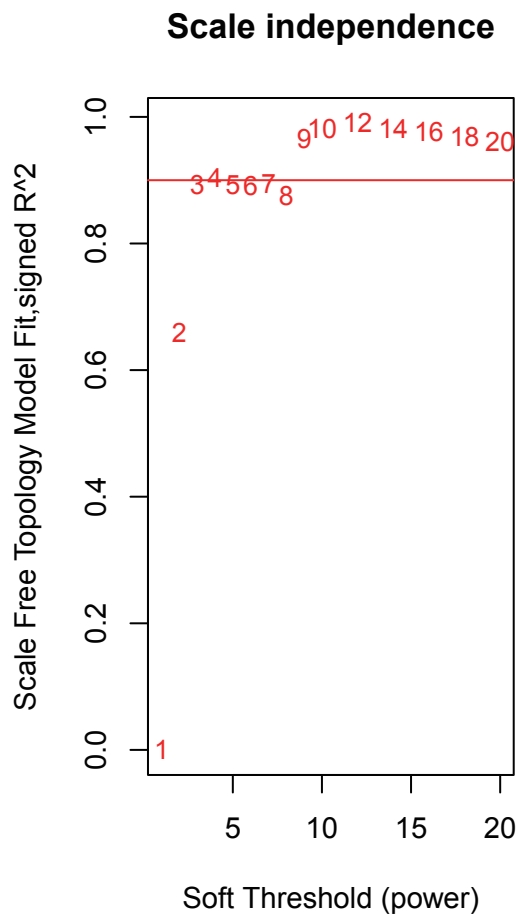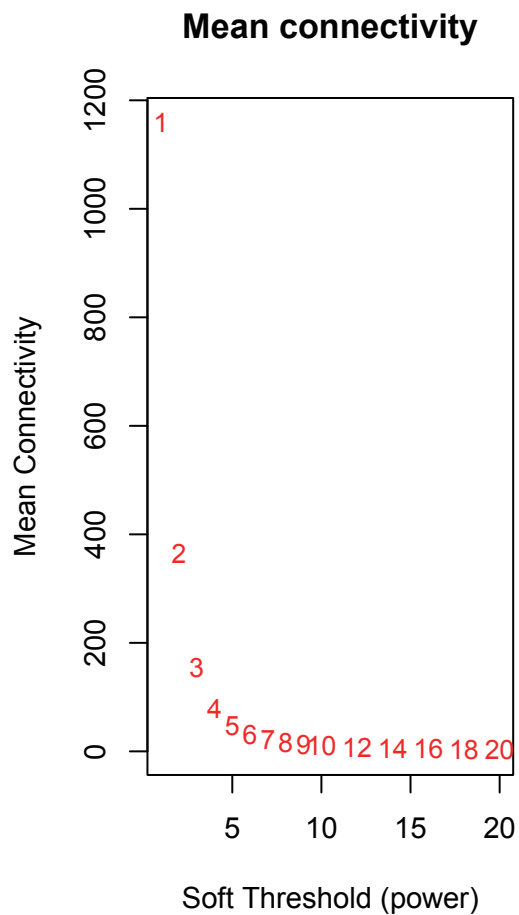

Figure S4

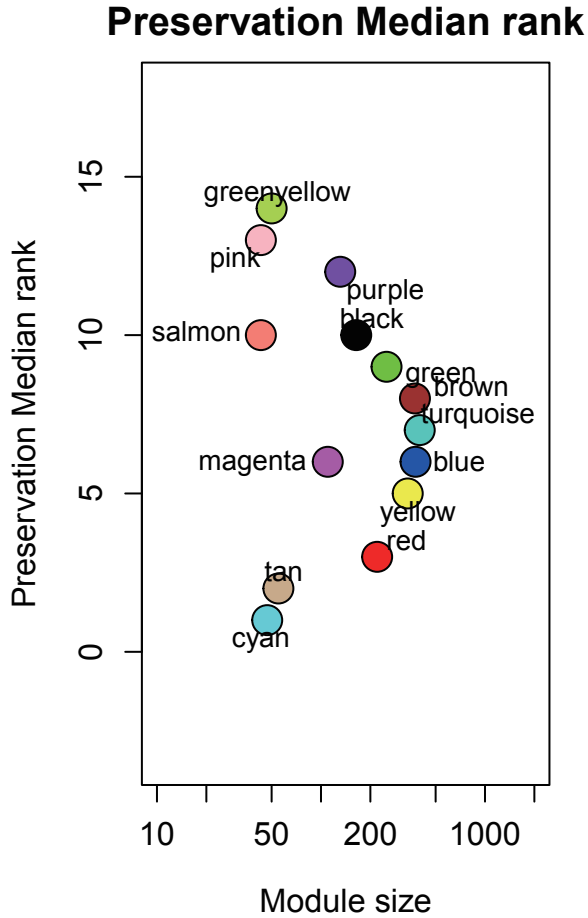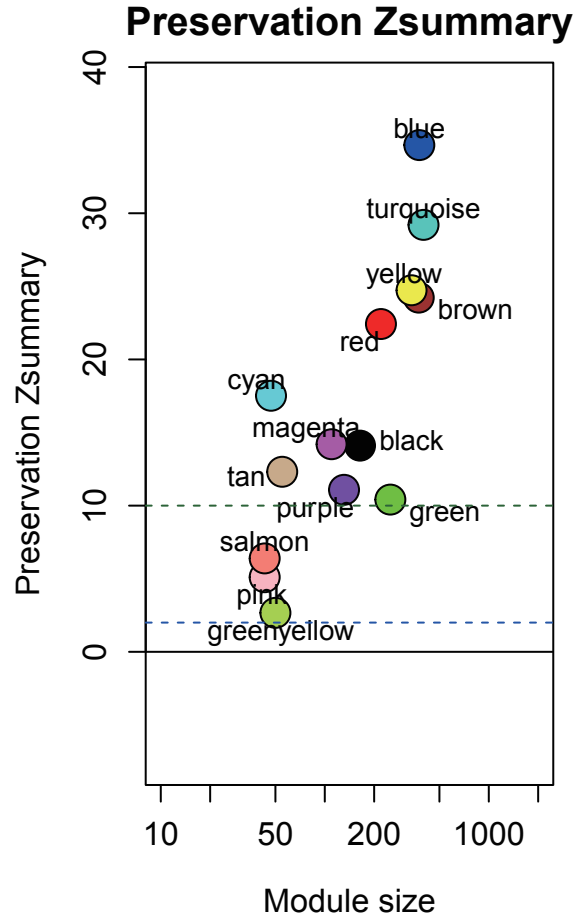



**DEmiRNAs in the ceRNA network**

| Symbol          | logFC        | AveExpr     | t            | P. Value | adj. P. Val | B           | group        | type  |
|-----------------|--------------|-------------|--------------|----------|-------------|-------------|--------------|-------|
| hsa-miR-125a-5p | -1.859889215 | 10.34313524 | -14.46967381 | 3.63E-37 | 6.66E-35    | 73.71851782 | downregulate | miRNA |
| hsa-miR-140-3p  | -1.278153043 | 9.233931313 | -11.76881169 | 5.60E-27 | 3.67E-25    | 50.47093093 | downregulate | miRNA |
| hsa-miR-140-5p  | -0.679776875 | 8.61002063  | -8.87942616  | 4.22E-17 | 8.60E-16    | 27.99496683 | downregulate | miRNA |
| hsa-miR-142-3p  | -3.310699599 | 9.570592987 | -16.95503002 | 6.11E-47 | 1.87E-44    | 96.03669615 | downregulate | miRNA |
| hsa-miR-142-5p  | -1.395608336 | 8.928458681 | -11.81431373 | 3.83E-27 | 2.70E-25    | 50.84849332 | downregulate | miRNA |
| hsa-miR-146b-5p | -0.86037352  | 9.433394673 | -5.859195665 | 1.12E-08 | 8.12E-08    | 8.982019323 | downregulate | miRNA |
| hsa-miR-28-5p   | -0.557666756 | 8.665958377 | -6.903641834 | 2.57E-11 | 2.43E-10    | 14.90795275 | downregulate | miRNA |
| hsa-miR-342-3p  | -1.479852746 | 9.262921776 | -13.07559494 | 7.95E-32 | 6.63E-30    | 61.528846   | downregulate | miRNA |
| hsa-miR-34c-5p  | -1.443074117 | 8.85615501  | -9.59741277  | 2.02E-19 | 5.15E-18    | 33.26331809 | downregulate | miRNA |
| hsa-miR-361-3p  | -0.640823507 | 10.13378732 | -3.990416058 | 8.11E-05 | 3.38E-04    | 0.434521413 | downregulate | miRNA |
| hsa-miR-361-5p  | -0.717123599 | 8.908437512 | -8.203011735 | 5.14E-15 | 7.61E-14    | 23.26550627 | downregulate | miRNA |
| hsa-miR-421     | -1.122229324 | 9.411207315 | -8.098008649 | 1.06E-14 | 1.50E-13    | 22.55328205 | downregulate | miRNA |
| hsa-miR-449a    | -0.75204128  | 8.886929824 | -7.840224353 | 6.12E-14 | 7.60E-13    | 20.83106808 | downregulate | miRNA |
| hsa-miR-564     | -0.75543993  | 9.61438955  | -3.91195101  | 1.11E-04 | 4.40E-04    | 0.138770045 | downregulate | miRNA |
| hsa-miR-574-5p  | 0.860834024  | 12.74338187 | 5.734293032  | 2.20E-08 | 1.54E-07    | 8.325333022 | upregulated  | miRNA |

## DEmRNAs in the ceRNA network

| Symbol    | logFC       | AveExpr     | t           | P. Value    | adj. P. Val | B            | group       | moduleColor |
|-----------|-------------|-------------|-------------|-------------|-------------|--------------|-------------|-------------|
| MYC       | 1.221070851 | 8.808032021 | 3.785372339 | 4.84E-04    | 0.004306487 | -0.540282105 | upregulated | salmon      |
| NPM1      | 0.640885388 | 12.04801949 | 4.542466409 | 4.68E-05    | 7.02E-04    | 1.693775438  | upregulated | salmon      |
| CDK4      | 1.439838722 | 9.85770533  | 6.647218013 | 4.79E-08    | 2.45E-06    | 8.37858912   | upregulated | turquoise   |
| ATL2      | 0.874078369 | 7.014891468 | 3.761027835 | 5.21E-04    | 0.00455857  | -0.609156039 | upregulated | turquoise   |
| NOP2      | 0.669241973 | 9.167533038 | 4.015685613 | 2.41E-04    | 0.002524064 | 0.121431036  | upregulated | turquoise   |
| XPOT      | 1.243547995 | 9.798126402 | 6.839642198 | 2.54E-08    | 1.48E-06    | 8.996837804  | upregulated | turquoise   |
| KIAA1549L | 0.536931105 | 6.800755122 | 3.213792126 | 0.002527051 | 0.015595936 | -2.09470596  | upregulated | turquoise   |
| UCK2      | 0.682872613 | 7.483707611 | 4.807357198 | 2.01E-05    | 3.59E-04    | 2.508943829  | upregulated | turquoise   |
| TFRC      | 0.520498319 | 7.554836097 | 5.965970222 | 4.54E-07    | 1.56E-05    | 6.185475301  | upregulated | turquoise   |
| TPI1      | 0.721345846 | 9.646985336 | 4.283292689 | 1.06E-04    | 0.001333046 | 0.911027683  | upregulated | turquoise   |
| GGCT      | 1.085088371 | 10.94257157 | 5.610064818 | 1.47E-06    | 4.27E-05    | 5.043618731  | upregulated | turquoise   |
| FERMT1    | 0.996010276 | 8.279014772 | 5.772781789 | 8.59E-07    | 2.73E-05    | 5.564887767  | upregulated | turquoise   |
| LAMB1     | 2.315728145 | 7.256558426 | 7.317460385 | 5.31E-09    | 4.07E-07    | 10.52459798  | upregulated | turquoise   |
| UNG       | 1.022193356 | 8.226059252 | 5.757386979 | 9.04E-07    | 2.84E-05    | 5.515505422  | upregulated | turquoise   |
| TMTC3     | 0.718289391 | 8.060036576 | 3.054976896 | 0.003911756 | 0.021723813 | -2.500423884 | upregulated | turquoise   |
| TWSG1     | 0.99847215  | 7.561078418 | 3.821466852 | 4.35E-04    | 0.003961936 | -0.437774991 | upregulated | turquoise   |
| FJX1      | 1.505847335 | 7.520104665 | 5.767304365 | 8.75E-07    | 2.76E-05    | 5.547316295  | upregulated | turquoise   |
| IFNG      | 1.163718662 | 6.996755616 | 4.618357219 | 3.68E-05    | 5.75E-04    | 1.925887284  | upregulated | turquoise   |
| ZNRF3     | 1.477360629 | 7.193780095 | 5.56070606  | 1.73E-06    | 4.85E-05    | 4.885832662  | upregulated | turquoise   |
| LAMC1     | 0.658408205 | 8.78349495  | 4.216674176 | 1.30E-04    | 0.001562873 | 0.712563907  | upregulated | turquoise   |
| GLCE      | 0.840745114 | 7.592239922 | 2.665670541 | 0.010879997 | 0.046720791 | -3.43789224  | upregulated | turquoise   |
| FZD7      | 1.46644514  | 7.286328522 | 4.19511826  | 1.39E-04    | 0.001650514 | 0.64860572   | upregulated | turquoise   |
| ECT2      | 0.719969628 | 6.881106107 | 5.328127671 | 3.71E-06    | 9.13E-05    | 4.145017172  | upregulated | turquoise   |
| PHB2      | 0.684971543 | 10.86247757 | 3.272978957 | 0.002141595 | 0.013713934 | -1.94034929  | upregulated | turquoise   |
| TM7SF3    | 1.138785743 | 8.636023627 | 4.240006555 | 1.21E-04    | 0.00148122  | 0.78193723   | upregulated | turquoise   |
| BLMH      | 0.713112045 | 8.075104735 | 4.112979338 | 1.79E-04    | 0.001995607 | 0.406098924  | upregulated | turquoise   |
| PTPN14    | 0.644201499 | 7.204456877 | 3.05289499  | 0.003933944 | 0.021818582 | -2.505657764 | upregulated | turquoise   |
| AHCY      | 0.921096337 | 9.344512483 | 4.441215093 | 6.44E-05    | 9.00E-04    | 1.386069753  | upregulated | turquoise   |
| VANGL2    | 0.986451529 | 7.520729116 | 4.208124298 | 1.34E-04    | 0.001599242 | 0.68718029   | upregulated | turquoise   |
| ZNF738    | 0.739737575 | 6.845256784 | 2.657180062 | 0.011116338 | 0.047470734 | -3.457362522 | upregulated | turquoise   |
| CPS1      | 0.609868409 | 5.540628317 | 2.666567083 | 0.010855313 | 0.046691334 | -3.435833744 | upregulated | turquoise   |
| FNDC3B    | 0.756511446 | 7.430682517 | 4.836731582 | 1.83E-05    | 3.32E-04    | 2.600153151  | upregulated | turquoise   |

|         |              |             |              |             |             |              |              |           |
|---------|--------------|-------------|--------------|-------------|-------------|--------------|--------------|-----------|
| SOX4    | 0.735307863  | 7.942177378 | 4.031773313  | 2.30E-04    | 0.002429249 | 0.168301442  | upregulated  | turquoise |
| IGF2BP3 | 0.941337942  | 6.459476325 | 3.357402424  | 0.001687227 | 0.011419083 | -1.717348556 | upregulated  | turquoise |
| JAK2    | 0.774128797  | 7.099387187 | 3.128669031  | 0.003198139 | 0.018692305 | -2.313733639 | upregulated  | turquoise |
| LDHA    | 1.020697726  | 12.39917782 | 5.63603087   | 1.35E-06    | 3.99E-05    | 5.126692764  | upregulated  | turquoise |
| LMNB2   | 0.969277056  | 7.946167817 | 5.464283149  | 2.37E-06    | 6.30E-05    | 4.578130301  | upregulated  | turquoise |
| FKBP5   | 0.618867401  | 8.04032831  | 5.24889518   | 4.80E-06    | 1.13E-04    | 3.89383255   | upregulated  | turquoise |
| PAX5    | -0.948595788 | 7.2846298   | -4.453384231 | 6.20E-05    | 8.77E-04    | 1.422927947  | downregulate | turquoise |
| PRKCB   | -0.547731869 | 7.003481117 | -3.150808437 | 0.003008991 | 0.017865988 | -2.257110854 | downregulate | turquoise |

---



**Enriched GO terms and KEGG pathways for the genes in the ceRNA network**

| ONTOLOGY | ID         | Description                                                       | GeneRatio | BgRatio   | pvalue      | p.adjust    | qvalue      | geneID                                      | Count |
|----------|------------|-------------------------------------------------------------------|-----------|-----------|-------------|-------------|-------------|---------------------------------------------|-------|
| BP       | GO:0006913 | nucleocytoplasmic transport                                       | 8/39      | 357/18493 | 6.51E-07    | 0.000550687 | 0.00036991  | NPM1/XPOT/FERMT1/IFNG/ECT2/PHB2/PTPN14/JAK2 | 8     |
| BP       | GO:0051169 | nuclear transport                                                 | 8/39      | 360/18493 | 6.93E-07    | 0.000550687 | 0.00036991  | NPM1/XPOT/FERMT1/IFNG/ECT2/PHB2/PTPN14/JAK2 | 8     |
| BP       | GO:0046822 | regulation of nucleocytoplasmic transport                         | 5/39      | 112/18493 | 3.64E-06    | 0.001927288 | 0.001294605 | FERMT1/IFNG/ECT2/PTPN14/JAK2                | 5     |
| BP       | GO:0042306 | regulation of protein import into nucleus                         | 4/39      | 64/18493  | 9.80E-06    | 0.003738317 | 0.002511115 | FERMT1/IFNG/ECT2/JAK2                       | 4     |
| BP       | GO:1904589 | regulation of protein import                                      | 4/39      | 67/18493  | 1.18E-05    | 0.003738317 | 0.002511115 | FERMT1/IFNG/ECT2/JAK2                       | 4     |
| BP       | GO:0006606 | protein import into nucleus                                       | 5/39      | 157/18493 | 1.89E-05    | 0.004997154 | 0.003356705 | FERMT1/IFNG/ECT2/PHB2/JAK2                  | 5     |
| BP       | GO:0051170 | import into nucleus                                               | 5/39      | 178/18493 | 3.45E-05    | 0.007829094 | 0.005258986 | FERMT1/IFNG/ECT2/PHB2/JAK2                  | 5     |
| BP       | GO:0000060 | protein import into nucleus, translocation                        | 3/39      | 38/18493  | 6.95E-05    | 0.012775392 | 0.008581529 | IFNG/PHB2/JAK2                              | 3     |
| BP       | GO:2000027 | regulation of organ morphogenesis                                 | 5/39      | 208/18493 | 7.24E-05    | 0.012775392 | 0.008581529 | MYC/ZNRF3/FZD7/PHB2/VANGL2                  | 5     |
| BP       | GO:0017038 | protein import                                                    | 5/39      | 214/18493 | 8.28E-05    | 0.01281893  | 0.008610775 | FERMT1/IFNG/ECT2/PHB2/JAK2                  | 5     |
| BP       | GO:0042307 | positive regulation of protein import into nucleus                | 3/39      | 42/18493  | 9.40E-05    | 0.01281893  | 0.008610775 | IFNG/ECT2/JAK2                              | 3     |
| BP       | GO:0000096 | sulfur amino acid metabolic process                               | 3/39      | 44/18493  | 0.000108175 | 0.01281893  | 0.008610775 | BLMH/AHCY/CPS1                              | 3     |
| BP       | GO:1904591 | positive regulation of protein import                             | 3/39      | 44/18493  | 0.000108175 | 0.01281893  | 0.008610775 | IFNG/ECT2/JAK2                              | 3     |
| BP       | GO:1900180 | regulation of protein localization to nucleus                     | 4/39      | 121/18493 | 0.00012015  | 0.01281893  | 0.008610775 | FERMT1/IFNG/ECT2/JAK2                       | 4     |
| BP       | GO:0033157 | regulation of intracellular protein transport                     | 5/39      | 232/18493 | 0.000121009 | 0.01281893  | 0.008610775 | FERMT1/IFNG/ECT2/PTPN14/JAK2                | 5     |
| BP       | GO:1905330 | regulation of morphogenesis of an epithelium                      | 4/39      | 134/18493 | 0.000178072 | 0.01688805  | 0.011344097 | ZNRF3/FZD7/PHB2/VANGL2                      | 4     |
| BP       | GO:0051222 | positive regulation of protein transport                          | 6/39      | 402/18493 | 0.000180678 | 0.01688805  | 0.011344097 | FERMT1/IFNG/ECT2/TM7SF3/SOX4/JAK2           | 6     |
| BP       | GO:0050673 | epithelial cell proliferation                                     | 6/39      | 420/18493 | 0.000228936 | 0.019151203 | 0.012864311 | MYC/FERMT1/LAMB1/LAMC1/FZD7/PHB2            | 6     |
| BP       | GO:0032386 | regulation of intracellular transport                             | 6/39      | 422/18493 | 0.000234871 | 0.019151203 | 0.012864311 | FERMT1/IFNG/ECT2/PTPN14/JAK2/PRKCB          | 6     |
| BP       | GO:0034504 | protein localization to nucleus                                   | 5/39      | 269/18493 | 0.000241047 | 0.019151203 | 0.012864311 | FERMT1/IFNG/ECT2/PHB2/JAK2                  | 5     |
| BP       | GO:0033160 | positive regulation of protein import into nucleus, translocation | 2/39      | 12/18493  | 0.000282232 | 0.020466883 | 0.013748084 | IFNG/JAK2                                   | 2     |
| BP       | GO:1904951 | positive regulation of establishment of protein localization      | 6/39      | 437/18493 | 0.000283368 | 0.020466883 | 0.013748084 | FERMT1/IFNG/ECT2/TM7SF3/SOX4/JAK2           | 6     |
| BP       | GO:0060071 | Wnt signaling pathway, planar cell polarity pathway               | 3/39      | 63/18493  | 0.000315495 | 0.021170514 | 0.014220729 | ZNRF3/FZD7/VANGL2                           | 3     |
| BP       | GO:0090068 | positive regulation of cell cycle process                         | 5/39      | 286/18493 | 0.000319756 | 0.021170514 | 0.014220729 | NPM1/CDK4/ECT2/PHB2/SOX4                    | 5     |
| BP       | GO:0090175 | regulation of establishment of planar polarity                    | 3/39      | 65/18493  | 0.000346019 | 0.021992943 | 0.014773174 | ZNRF3/FZD7/VANGL2                           | 3     |
| BP       | GO:0046824 | positive regulation of nucleocytoplasmic transport                | 3/39      | 67/18493  | 0.000378384 | 0.022840552 | 0.015342532 | IFNG/ECT2/JAK2                              | 3     |
| BP       | GO:0050667 | homocysteine metabolic process                                    | 2/39      | 14/18493  | 0.000388103 | 0.022840552 | 0.015342532 | BLMH/CPS1                                   | 2     |
| BP       | GO:0032024 | positive regulation of insulin secretion                          | 3/39      | 70/18493  | 0.000430487 | 0.024051191 | 0.016155747 | TM7SF3/SOX4/JAK2                            | 3     |
| BP       | GO:0050796 | regulation of insulin secretion                                   | 4/39      | 172/18493 | 0.000461019 | 0.024051191 | 0.016155747 | IFNG/TM7SF3/SOX4/JAK2                       | 4     |
| BP       | GO:0002009 | morphogenesis of an epithelium                                    | 6/39      | 479/18493 | 0.00046207  | 0.024051191 | 0.016155747 | MYC/ZNRF3/FZD7/PHB2/VANGL2/SOX4             | 6     |
| BP       | GO:0030111 | regulation of Wnt signaling pathway                               | 5/39      | 311/18493 | 0.000469218 | 0.024051191 | 0.016155747 | FERMT1/ZNRF3/FZD7/VANGL2/SOX4               | 5     |
| BP       | GO:0033158 | regulation of protein import into nucleus, translocation          | 2/39      | 16/18493  | 0.000510421 | 0.025345602 | 0.017025233 | IFNG/JAK2                                   | 2     |
| BP       | GO:0007369 | gastrulation                                                      | 4/39      | 181/18493 | 0.000558702 | 0.025666543 | 0.017240816 | LAMB1/TWEG1/FZD7/VANGL2                     | 4     |
| BP       | GO:0046209 | nitric oxide metabolic process                                    | 3/39      | 77/18493  | 0.000569435 | 0.025666543 | 0.017240816 | IFNG/CPS1/JAK2                              | 3     |
| BP       | GO:1900182 | positive regulation of protein localization to nucleus            | 3/39      | 78/18493  | 0.000591351 | 0.025666543 | 0.017240816 | IFNG/ECT2/JAK2                              | 3     |
| BP       | GO:0034404 | nucleobase-containing small molecule biosynthetic process         | 4/39      | 184/18493 | 0.000594303 | 0.025666543 | 0.017240816 | UCK2/TPI1/UNG/LDHA                          | 4     |
| BP       | GO:0001736 | establishment of planar polarity                                  | 3/39      | 79/18493  | 0.0006138   | 0.025666543 | 0.017240816 | ZNRF3/FZD7/VANGL2                           | 3     |
| BP       | GO:0007164 | establishment of tissue polarity                                  | 3/39      | 79/18493  | 0.0006138   | 0.025666543 | 0.017240816 | ZNRF3/FZD7/VANGL2                           | 3     |
| BP       | GO:2001057 | reactive nitrogen species metabolic process                       | 3/39      | 80/18493  | 0.000636787 | 0.025945001 | 0.017427863 | IFNG/CPS1/JAK2                              | 3     |
| BP       | GO:0031589 | cell-substrate adhesion                                           | 5/39      | 338/18493 | 0.000684388 | 0.027187326 | 0.018262362 | FERMT1/LAMB1/LAMC1/FZD7/JAK2                | 5     |
| BP       | GO:0034446 | substrate adhesion-dependent cell spreading                       | 3/39      | 87/18493  | 0.000813199 | 0.030994021 | 0.020819408 | LAMB1/LAMC1/FZD7                            | 3     |
| BP       | GO:0030073 | insulin secretion                                                 | 4/39      | 203/18493 | 0.000858236 | 0.030994021 | 0.020819408 | IFNG/TM7SF3/SOX4/JAK2                       | 4     |
| BP       | GO:0050679 | positive regulation of epithelial cell proliferation              | 4/39      | 203/18493 | 0.000858236 | 0.030994021 | 0.020819408 | MYC/LAMB1/LAMC1/FZD7                        | 4     |
| BP       | GO:0090276 | regulation of peptide hormone secretion                           | 4/39      | 203/18493 | 0.000858236 | 0.030994021 | 0.020819408 | IFNG/TM7SF3/SOX4/JAK2                       | 4     |
| BP       | GO:0006790 | sulfur compound metabolic process                                 | 5/39      | 362/18493 | 0.000931411 | 0.032889169 | 0.022092423 | GGCT/GLCE/BLMH/AHCY/CPS1                    | 5     |
| BP       | GO:0090277 | positive regulation of peptide hormone secretion                  | 3/39      | 93/18493  | 0.000986923 | 0.033699295 | 0.022636604 | TM7SF3/SOX4/JAK2                            | 3     |
| BP       | GO:0050678 | regulation of epithelial cell proliferation                       | 5/39      | 368/18493 | 0.001002398 | 0.033699295 | 0.022636604 | MYC/LAMB1/LAMC1/FZD7/PHB2                   | 5     |

|    |            |                                                                  |      |           |             |             |             |                              |   |
|----|------------|------------------------------------------------------------------|------|-----------|-------------|-------------|-------------|------------------------------|---|
| BP | GO:0060993 | kidney morphogenesis                                             | 3/39 | 94/18493  | 0.001017977 | 0.033699295 | 0.022636604 | MYC/VANGL2/SOX4              | 3 |
| BP | GO:0001738 | morphogenesis of a polarized epithelium                          | 3/39 | 95/18493  | 0.001049645 | 0.033832187 | 0.022725871 | ZNRF3/FZD7/VANGL2            | 3 |
| BP | GO:1903532 | positive regulation of secretion by cell                         | 5/39 | 373/18493 | 0.001064575 | 0.033832187 | 0.022725871 | FERMT1/IFNG/TM7SF3/SOX4/JAK2 | 5 |
| BP | GO:0048103 | somatic stem cell division                                       | 2/39 | 24/18493  | 0.001161526 | 0.034947931 | 0.023475342 | FZD7/VANGL2                  | 2 |
| BP | GO:0050855 | regulation of B cell receptor signaling pathway                  | 2/39 | 24/18493  | 0.001161526 | 0.034947931 | 0.023475342 | PAX5/PRKCB                   | 2 |
| BP | GO:1901989 | positive regulation of cell cycle phase transition               | 3/39 | 100/18493 | 0.001217343 | 0.034947931 | 0.023475342 | NPM1/CDK4/PHB2               | 3 |
| BP | GO:0072527 | pyrimidine-containing compound metabolic process                 | 3/39 | 101/18493 | 0.001252787 | 0.034947931 | 0.023475342 | UCK2/UNG/CPS1                | 3 |
| BP | GO:0015012 | heparan sulfate proteoglycan biosynthetic process                | 2/39 | 25/18493  | 0.001260849 | 0.034947931 | 0.023475342 | GLCE/VANGL2                  | 2 |
| BP | GO:0060330 | regulation of response to interferon-gamma                       | 2/39 | 25/18493  | 0.001260849 | 0.034947931 | 0.023475342 | IFNG/JAK2                    | 2 |
| BP | GO:0060334 | regulation of interferon-gamma-mediated signaling pathway        | 2/39 | 25/18493  | 0.001260849 | 0.034947931 | 0.023475342 | IFNG/JAK2                    | 2 |
| BP | GO:0035567 | non-canonical Wnt signaling pathway                              | 3/39 | 102/18493 | 0.001288876 | 0.034947931 | 0.023475342 | ZNRF3/FZD7/VANGL2            | 3 |
| BP | GO:0045787 | positive regulation of cell cycle                                | 5/39 | 390/18493 | 0.001297626 | 0.034947931 | 0.023475342 | NPM1/CDK4/ECT2/PHB2/SOX4     | 5 |
| BP | GO:0045830 | positive regulation of isotype switching                         | 2/39 | 27/18493  | 0.001471272 | 0.038664814 | 0.025972059 | TFRC/UNG                     | 2 |
| BP | GO:0060828 | regulation of canonical Wnt signaling pathway                    | 4/39 | 236/18493 | 0.001497839 | 0.038664814 | 0.025972059 | FERMT1/ZNRF3/FZD7/SOX4       | 4 |
| BP | GO:0051047 | positive regulation of secretion                                 | 5/39 | 404/18493 | 0.001516363 | 0.038664814 | 0.025972059 | FERMT1/IFNG/TM7SF3/SOX4/JAK2 | 5 |
| BP | GO:0030099 | myeloid cell differentiation                                     | 5/39 | 405/18493 | 0.001532966 | 0.038664814 | 0.025972059 | MYC/TFRC/IFNG/JAK2/PRKCB     | 5 |
| BP | GO:0007050 | cell cycle arrest                                                | 4/39 | 241/18493 | 0.001617493 | 0.040159326 | 0.026975958 | MYC/CDK4/IFNG/SOX4           | 4 |
| BP | GO:0030072 | peptide hormone secretion                                        | 4/39 | 244/18493 | 0.001692402 | 0.041372725 | 0.027791026 | IFNG/TM7SF3/SOX4/JAK2        | 4 |
| BP | GO:0050714 | positive regulation of protein secretion                         | 4/39 | 246/18493 | 0.001743665 | 0.041980045 | 0.028198977 | FERMT1/TM7SF3/SOX4/JAK2      | 4 |
| BP | GO:0030201 | heparan sulfate proteoglycan metabolic process                   | 2/39 | 31/18493  | 0.001938776 | 0.045081409 | 0.030282235 | GLCE/VANGL2                  | 2 |
| BP | GO:1902751 | positive regulation of cell cycle G2/M phase transition          | 2/39 | 31/18493  | 0.001938776 | 0.045081409 | 0.030282235 | NPM1/CDK4                    | 2 |
| BP | GO:0001704 | formation of primary germ layer                                  | 3/39 | 118/18493 | 0.001957594 | 0.045081409 | 0.030282235 | LAMB1/TWSG1/FZD7             | 3 |
| BP | GO:0051091 | positive regulation of DNA binding transcription factor activity | 4/39 | 255/18493 | 0.001987783 | 0.045122679 | 0.030309958 | NPM1/PHB2/JAK2/PRKCB         | 4 |
| BP | GO:0045727 | positive regulation of translation                               | 3/39 | 120/18493 | 0.002053743 | 0.045963349 | 0.030874655 | NPM1/CDK4/SOX4               | 3 |
| BP | GO:0050708 | regulation of protein secretion                                  | 5/39 | 438/18493 | 0.002160125 | 0.047084881 | 0.031628015 | FERMT1/IFNG/TM7SF3/SOX4/JAK2 | 5 |
| BP | GO:0046883 | regulation of hormone secretion                                  | 4/39 | 261/18493 | 0.002163119 | 0.047084881 | 0.031628015 | IFNG/TM7SF3/SOX4/JAK2        | 4 |
| BP | GO:0002793 | positive regulation of peptide secretion                         | 4/39 | 265/18493 | 0.00228579  | 0.049082708 | 0.032970002 | FERMT1/TM7SF3/SOX4/JAK2      | 4 |
| BP | GO:0010922 | positive regulation of phosphatase activity                      | 2/39 | 34/18493  | 0.002329727 | 0.049359158 | 0.0331557   | IFNG/JAK2                    | 2 |
| CC | GO:0034399 | nuclear periphery                                                | 4/42 | 134/19659 | 0.000188963 | 0.01757358  | 0.015713784 | XPOT/PHB2/JAK2/LMNB2         | 4 |
| MF | GO:0043024 | ribosomal small subunit binding                                  | 2/38 | 16/17632  | 0.000532491 | 0.047309582 | 0.038063358 | NPM1/UNG                     | 2 |
| MF | GO:0035173 | histone kinase activity                                          | 2/38 | 17/17632  | 0.00060267  | 0.047309582 | 0.038063358 | JAK2/PRKCB                   | 2 |

Gene set enrichment analysis (GSEA) for ZNF667-AS1 using GSE102349

| ID                                                 | setSize | enrichmentScore | NES         | pvalue      | p.adjust    | qvalues     | rank | leading edge                      | core enrichment                                                                                                                                                                                                                                                                                                                                                                                                                                                                                                                                                                                                                                                                                                                                                                                                                                                                                                                                                                                                                                          |
|----------------------------------------------------|---------|-----------------|-------------|-------------|-------------|-------------|------|-----------------------------------|----------------------------------------------------------------------------------------------------------------------------------------------------------------------------------------------------------------------------------------------------------------------------------------------------------------------------------------------------------------------------------------------------------------------------------------------------------------------------------------------------------------------------------------------------------------------------------------------------------------------------------------------------------------------------------------------------------------------------------------------------------------------------------------------------------------------------------------------------------------------------------------------------------------------------------------------------------------------------------------------------------------------------------------------------------|
| KEGG_CYTOKINE_CYTOKINE_REC<br>EPTOR_INTERACTION    | 260     | 0.612102228     | 1.9795786   | 0.001067236 | 0.011027659 | 0.007341315 | 3261 | tags=41%, list=13%,<br>signal=36% | CCL21/CCL14/CXCL14/TNFRSF13B/CXCR5/CCL19/CXCL12/TGFBR2/TNFRSF17/CCR7/P<br>DGFRB/TNFRSF13C/IL1R1/CCR6/CD27/CXCL13/IL18/CCL28/TNFSF12/TNFSF13B/CCL<br>24/CD40LG/TGFB3/IL10RA/TNFSF8/IL7R/LTB/CCR2/CXCL9/TNFSF11/CXCR3/LTA/PL<br>EKH02/CCL11/IL21R/CSF1R/IL2RB/IL3RA/TGFB1/TNFSF13/CCR4/IL6R/IL12RB1/CX<br>CR6/TNFRSF1B/VEGFC/ACVRL1/FLT3/CSF2RA/FLT3LG/CCL15/CCL18/TNFSF14/CSF3R<br>/LEPR/CCR5/CCL4L2/CCR1/CCL13/IL2RG/IFNLR1/IL5RA/CLCF1/IL9R/KDR/FLT4/IL<br>2RA/XCL2/IFNAR2/PDGFC/CXCR4/INHBB/CXCR2/XCR1/CCL2/CXCL16/TNFRSF6B/TNFR<br>SF19/TNFRSF10D/CSF2RB/TNFRSF10C/IL6ST/CCL22/CXCL11/CCL3L1/IL4R/CCL26/I<br>L18RAP/IFNAR1/IL18R1/CCL23/CCL3L3/TNFRSF14/TNFRSF25/CCL5/FASLG/IL21/HG<br>F/PDGFB/PDGFR/TNFRSF18/IL10RB/CX3CR1/TGFBR1/CCL17/CNTF                                                                                                                                                                                                                                                                                                         |
| KEGG_OLFACTORY_TRANSDUCTIO<br>N                    | 249     | 0.478581809     | 1.542215299 | 0.001072961 | 0.011027659 | 0.007341315 | 3729 | tags=4%, list=15%,<br>signal=4%   | PRKACB/CALM1/CLCA4/ARRB2/CLCA2/CNGA4/PRKG1/GNAL/CAMK2D/GUCA1A/OR52N4                                                                                                                                                                                                                                                                                                                                                                                                                                                                                                                                                                                                                                                                                                                                                                                                                                                                                                                                                                                     |
| KEGG_CHEMOKINE_SIGNALING_P<br>ATHWAY               | 184     | 0.639644324     | 2.016701669 | 0.001114827 | 0.011027659 | 0.007341315 | 3240 | tags=43%, list=13%,<br>signal=38% | CCL21/CCL14/CXCL14/RASGRP2/CXCR5/CCL19/CXCL12/CCR7/PRKCB/NCF1/CCR6/CXC<br>L13/CCL28/WAS/CCL24/PLCB2/GNG11/PREX1/GNG7/PIK3CD/ITK/CCR2/FGR/VAV1/CX<br>CL9/ADCY7/PIK3CG/ELM01/GNB4/PRKACB/LYN/CXCR3/DOCK2/PIK3R5/CCL11/ADCY4/<br>CCR4/CXCR6/ARRB2/CSK/GNA12/GRK5/PTK2B/CCL15/SHC2/CCL18/GNG2/STAT5B/PRK<br>CD/RAC2/CCR5/CCL4L2/CCR1/CCL13/GNGT2/MAPK3/RAP1A/STAT1/XCL2/CXCR4/GRK6<br>/CXCR2/XCR1/CCL2/CXCL16/PIK3R1/CCL22/CXCL11/CCL3L1/SOS2/VAV3/CCL26/CCL<br>23/CCL3L3/CCL5/GNG10/ROCK1/RHOA/CX3CR1/CCL17                                                                                                                                                                                                                                                                                                                                                                                                                                                                                                                                                 |
| KEGG_CALCIUM_SIGNALING_PAT<br>HWAY                 | 176     | 0.504091104     | 1.588369872 | 0.001119821 | 0.011027659 | 0.007341315 | 3465 | tags=30%, list=14%,<br>signal=26% | ATP2A3/PLCG2/PDGFRB/PRKCB/P2RX5/CD38/MYLK/PLCB2/GNA14/F2R/CYSLTR1/ADCY<br>7/EDNRA/PRKACB/ADCY4/CALM1/EDNRB/PPP3CC/P2RX1/BST1/ITPR2/PTK2B/PLCD1/P<br>TGER3/PTAFR/ITPR1/NOS3/P2RX7/SLC8A1/PTGFR/PLCE1/GNAL/SPHK1/CAMK2D/PDE1<br>B/HRH1/OXTR/PRKCA/TNNC1/CACNA1C/CAMK4/NOS2/ADORA2A/TRPC1/GNAQ/PDGFR/T<br>NNC2/PDE1A/LTB4R2/TBXA2R/PPP3CA/ADRB2/CACNA1H                                                                                                                                                                                                                                                                                                                                                                                                                                                                                                                                                                                                                                                                                                     |
| KEGG_NATURAL_KILLER_CELL_M<br>EDIATED_CYTOTOXICITY | 132     | 0.601581433     | 1.839628229 | 0.001176471 | 0.011027659 | 0.007341315 | 3760 | tags=43%, list=15%,<br>signal=37% | CD48/PLCG2/PRKCB/NCR3/ITGAL/KLRK1/ITGB2/HGST/PIK3CD/VAV1/PTPN6/LCK/CD2<br>47/PIK3CG/LAT/HLA-E/SH2D1A/FYN/PIK3R5/ZAP70/LCP2/TYROBP/HLA-<br>C/NFATC2/PPP3CC/PTK2B/HLA-G/NFATC1/NFATC4/SHC2/HLA-<br>B/RAC2/MAPK3/RAET1E/FCER1G/HLA-<br>A/IFNAR2/KLRD1/CD244/MICB/TNFRSF10D/PIK3R1/FCGR3A/ICAM2/TNFRSF10C/SOS2<br>/VAV3/PRKCA/KLRC3/IFNAR1/FASLG/KLRC1/PPP3CA/RAET1G/GRB2/SHC1/SYK<br>C3/C1S/C7/C2/CD40LG/CTSG/HLA-DQA2/CD28/FCGR2B/C1QA/C1QC/C1R/CD86/HLA-<br>DOB/C1QB/ACTN1/HLA-DMA/HLA-DMB/HLA-DOA/HLA-<br>DPA1/FCGR2C/HIST2H2BE/FCGR1A/HLA-DPB1/H2AFJ/HLA-<br>DRA/FCGR3A/CD80/HIST2H2AA4/HIST2H4A/HLA-DRB1/TRIM21/HIST1H2AC/FCGR2A<br>CD22/SELL/SELP/ITGA4/PTPRC/CD6/ITGAL/ICAM3/CD40LG/CADM3/ITGB2/HLA-<br>DQA2/JAM3/CD28/PECAM1/JAM2/SELPLG/CD4/CD2/CD34/HLA-<br>E/CD86/CD8B/ITGB7/CDH5/SPN/ICOS/HLA-DOB/CD8A/PDCD1/HLA-C/ESAM/HLA-<br>DMA/HLA-DMB/HLA-DOA/HLA-DPA1/HLA-G/CLDN23/CLDN10/CD226/HLA-<br>B/CLDN11/CTLA4/CLDN5/HLA-F/ITGA8/PDCD1LG2/HLA-A/VCAN/HLA-<br>DPB1/PTPRM/SIGLEC1/HLA-<br>DRA/NFASC/ICAM2/NEGR1/CD80/CLDN3/SDC2/CD99/CDH2/HLA-DRB1 |
| KEGG_SYSTEMIC_LUPUS_ERYTHE<br>MATOSUS              | 124     | 0.537187019     | 1.634244652 | 0.001184834 | 0.011027659 | 0.007341315 | 3653 | tags=27%, list=15%,<br>signal=23% | CTSK/FUCA1/LAPTM5/CTSG/CTSS/CD68/CTSZ/ACP5/GALC/CTSC/CTSF/CTSH/LGMN/AP<br>1S2/IDS/CTSB/ATP6VOD1/LIPA/SMPD1/CTSD/TPP1/NAGA/TCIRG1/NPC2/SLC17A5/CT<br>SA/CTSW/PLA2G15/PSAP/GBA/AP1M2/HEXA/CTNS/ARSA/GNPTG/PPT1/AP4S1/HYAL1/A<br>TP6V0A4/GM2A/ATP6AP1/ARSG/ACP2/GNPTAB/CTSO/GALNS/AP1G1/NEU1/HEXB/GLB1/<br>LAPTM4A/ATP6V0A1/GNS/AP4B1/MAN2B1/ASAH1/ATP6VOD2/ATP6VOC/SORT1                                                                                                                                                                                                                                                                                                                                                                                                                                                                                                                                                                                                                                                                                   |
| KEGG_CELL_ADHESION_MOLECUL<br>ES_CAMS              | 128     | 0.615629301     | 1.872884903 | 0.001190476 | 0.011027659 | 0.007341315 | 3135 | tags=48%, list=13%,<br>signal=42% |                                                                                                                                                                                                                                                                                                                                                                                                                                                                                                                                                                                                                                                                                                                                                                                                                                                                                                                                                                                                                                                          |
| KEGG_LYSOSOME                                      | 119     | 0.574686245     | 1.735776254 | 0.001201923 | 0.011027659 | 0.007341315 | 4695 | tags=50%, list=19%,<br>signal=40% |                                                                                                                                                                                                                                                                                                                                                                                                                                                                                                                                                                                                                                                                                                                                                                                                                                                                                                                                                                                                                                                          |

|                                                   |     |             |             |             |             |             |      |                                |                                                                                                                                                                                                                                                                                                                                                                                                                                                                                                                                                                         |
|---------------------------------------------------|-----|-------------|-------------|-------------|-------------|-------------|------|--------------------------------|-------------------------------------------------------------------------------------------------------------------------------------------------------------------------------------------------------------------------------------------------------------------------------------------------------------------------------------------------------------------------------------------------------------------------------------------------------------------------------------------------------------------------------------------------------------------------|
| KEGG_T_CELL_RECEPTOR_SIGNALING_PATHWAY            | 107 | 0.566725816 | 1.692478382 | 0.001218027 | 0.011027659 | 0.007341315 | 3753 | tags=44%, list=15%, signal=37% | PTPRC/CARD11/CD3E/CD40LG/CD28/PIK3CD/ITK/CD3D/CD3G/VAV1/PTPN6/CD4/LCK/CD247/PIK3CG/LAT/CD8B/FYN/ICOS/PIK3R5/ZAP70/CD8A/LCP2/GRAP2/PDCD1/NFATC2/PPP3CC/PRKCQ/NFATC1/NFATC4/CTLA4/RASGRP1/FOS/MAPK3/MAP3K8/CBL/PIK3R1/SOS2/VAV3/TEC/RHOA/MAPK14/PPP3CA/PAK2/GRB2/IL2/CBLB/CXCL12/MMP2/PLCG2/ITGA4/MYL9/PRKCB/NCF1/RHOH/CYBB/ITGAL/ITGB2/JAM3/PIK3CD/SIPA1/ITK/PECAM1/CYBA/VAV1/JAM2/MMP9/PIK3CG/CDH5/PIK3R5/ACTN1/ESAM/THY1/TXK/GNAI2/PTK2B/CLDN23/CLDN10/CLDN11/CLDN5/RAC2/RAP1A/NCF4/VASP/CXCR4/PIK3R1/NCF2/RASSF5/VAV3/CLDN3/PRKCA/RAPGEF3/CD99/ROCK1/RHOA/MAPK14/ACTB |
| KEGG_LEUKOCYTE_TRANSENDOTHELIAL_MIGRATION         | 115 | 0.617231688 | 1.853976465 | 0.001219512 | 0.011027659 | 0.007341315 | 3366 | tags=43%, list=14%, signal=38% | PLA2G2D/RAMP3/MYL9/PRKCB/MYLK/PLCB2/ADCY7/EDNRA/ARHGEF1/PRKACB/ACTA2/RAMP2/MYH11/ADCY4/CALM1/PLA2G2A/PRKCQ/MRVI1/ITPR2/CALCRL/PRKCH/PRKCD/MAPK3/ITPR1/NPR2/PRKG1/CALD1/PPP1R12B/PPP1R14A/PRKCA/CACNA1C/ADORA2A/ROCK1/GNAQ/NPR1/RHOA/PLA2G10                                                                                                                                                                                                                                                                                                                             |
| KEGG_VASCULAR_SMOOTH_MUSCLE_CONTRACTION           | 113 | 0.554375529 | 1.660843367 | 0.00122399  | 0.011027659 | 0.007341315 | 3192 | tags=33%, list=13%, signal=29% | HLA-DQA2/CTSS/CD4/HLA-E/CD8B/LTA/HLA-DOB/CD8A/LGMN/HLA-C/HLA-DMA/HLA-DMB/HLA-DOA/CTSB/HLA-DPA1/HLA-G/HLA-B/B2M/HLA-F/IFI30/HLA-A/HLA-DPB1/KLRD1/CD74/HLA-DRA/KLRC3/HLA-DRB1/KLRC1                                                                                                                                                                                                                                                                                                                                                                                       |
| KEGG_ANTIGEN_PROCESSING_AND_PRESENTATION          | 80  | 0.610697234 | 1.772233527 | 0.001257862 | 0.011027659 | 0.007341315 | 3175 | tags=35%, list=13%, signal=31% | MS4A1/CR2/CD22/CD19/CD37/ITGA4/IL1R1/CD38/CR1/FCER2/CD5/CD3E/IL7R/CD3D/CD3G/CD1C/CD4/CD55/CD2/CD34/ITGA1/CD8B/GP1BA/CD1D/CD7/CD8A/CSF1R/IL3RA/IL6R/CD14/FLT3/CSF2RA/FLT3LG/CSF3R/MME/CD1E/IL5RA/ITGA5/IL9R/FCGR1A/IL2RA/CD36/CD33/HLA-DRA/IL4R                                                                                                                                                                                                                                                                                                                          |
| KEGG_HEMATOPOIETIC_CELL_LINEAGE                   | 84  | 0.73632525  | 2.14111201  | 0.001262626 | 0.011027659 | 0.007341315 | 2599 | tags=54%, list=11%, signal=48% | CD79A/CR2/CD22/CD19/CD79B/CD72/PLCG2/BTK/PRKCB/CARD11/RASGRP3/PIK3AP1/PIK3CD/VAV1/FCGR2B/PTPN6/PIK3CG/LYN/PIK3R5/NFATC2/PPP3CC/IFITM1/INPP5D/NFATC1/NFATC4/RAC2/FOS/MAPK3/PIK3R1/SOS2/VAV3/LILRB3/CD81/BLNK                                                                                                                                                                                                                                                                                                                                                             |
| KEGG_B_CELL_RECEPTOR_SIGNALING_PATHWAY            | 75  | 0.668235344 | 1.927123046 | 0.001264223 | 0.011027659 | 0.007341315 | 2919 | tags=45%, list=12%, signal=40% | C3/ITGA4/PRKCB/NCF1/CR1/TGFB3/ITGB2/HLA-DQA2/CYBA/TLR4/PTPN6/HLA-DOB/TGFB1/HLA-DMA/HLA-DMB/HLA-DOA/HLA-DPA1/FCGR2C/FOS/MAPK3/MYD88/FCGR1A/STAT1/HLA-DPB1/NCF4/HLA-DRA/NCF2/FCGR3A/JAK1/TLR2/NOS2/HLA-DRB1/MAPK14                                                                                                                                                                                                                                                                                                                                                        |
| KEGG_LEISHMANIA_INFECTION                         | 70  | 0.629671665 | 1.799886943 | 0.001277139 | 0.011027659 | 0.007341315 | 3295 | tags=47%, list=13%, signal=41% | GSTA1/ALDH1A3/ALDH3A1/AKR1C3/ADH1B/ALDH3B1/ADH1C/CYP1B1/GSTA2/ADH7/MGST1/GSTM3/CYP2F1/GSTM5/GSTM2/EPHX1/GSTK1/UGT2A1/GSTM4/GSTA3/GSTM1/GSTT1                                                                                                                                                                                                                                                                                                                                                                                                                            |
| KEGG_METABOLISM_OF_XENOBIOTICS_BY_CYTOCHROME_P450 | 70  | 0.617602495 | 1.765387786 | 0.001277139 | 0.011027659 | 0.007341315 | 3176 | tags=31%, list=13%, signal=27% | CR2/C3/SERPING1/CFH/C1S/CFI/C7/F13A1/A2M/CR1/C2/PROS1/F2R/SERPINA1/MASP1/C1QA/F3/CD55/C1QC/C1R/CFB/THBD/C1QB/VWF/F10/C3AR1                                                                                                                                                                                                                                                                                                                                                                                                                                              |
| KEGG_COMPLEMENT_AND_COAGULATION_CASCADES          | 68  | 0.793716221 | 2.263206549 | 0.00128041  | 0.011027659 | 0.007341315 | 1494 | tags=38%, list=6%, signal=36%  | GSTA1/FMO2/ALDH1A3/ALDH3A1/MAOB/ADH1B/ALDH3B1/ADH1C/GSTA2/ADH7/MGST1/GSTM3/FMO3/FMO1/FMO5/GSTM5/GSTM2/GSTK1/AOX1/UGT2A1/GSTM4/GSTA3/GSTM1/GSTT1                                                                                                                                                                                                                                                                                                                                                                                                                         |
| KEGG_DRUG_METABOLISM_CYTOCHROME_P450              | 72  | 0.632120592 | 1.812924413 | 0.00128041  | 0.011027659 | 0.007341315 | 3176 | tags=33%, list=13%, signal=29% | CD40LG/HLA-DQA2/CD28/HLA-E/CD86/HLA-DOB/HLA-C/HLA-DMA/HLA-DMB/HLA-DOA/HLA-DPA1/HLA-G/HLA-B/CTLA4/HLA-F/HLA-A/HLA-DPB1/HLA-DRA/CD80/FASLG/HLA-DRB1/IL2/PRF1/IL10/HLA-DQB1/TSHR/HLA-DQA1                                                                                                                                                                                                                                                                                                                                                                                  |
| KEGG_AUTOIMMUNE_THYROID_DISEASE                   | 50  | 0.721516754 | 1.965440377 | 0.001321004 | 0.011027659 | 0.007341315 | 4983 | tags=54%, list=20%, signal=43% | PIGR/TNFRSF13B/CXCL12/TNFRSF17/ITGA4/TNFRSF13C/CCL28/TNFSF13B/CD40LG/HLA-DQA2/CD28/CD86/ITGB7/ICOS/HLA-DOB/TGFB1/TNFSF13/HLA-DMA/AICDA/HLA-DMB/HLA-DOA/HLA-DPA1/HLA-DPB1/CXCR4/HLA-DRA/CD80                                                                                                                                                                                                                                                                                                                                                                             |
| KEGG_INTESTINAL_IMMUNE_NETWORK_FOR_IGA_PRODUCTION | 45  | 0.774684005 | 2.082738993 | 0.001335113 | 0.011027659 | 0.007341315 | 2644 | tags=58%, list=11%, signal=52% | HLA-DQA2/CD28/HLA-E/CD86/HLA-DOB/HLA-C/HLA-DMA/HLA-DMB/HLA-DOA/HLA-DPA1/HLA-G/HLA-B/HLA-F/HLA-A/HLA-DPB1/KLRD1/HLA-DRA/CD80/FASLG/HLA-DRB1/KLRC1/IL2/PRF1/TNF/HLA-DQB1/HLA-DQA1/KIR3DL2/IFNG                                                                                                                                                                                                                                                                                                                                                                            |
| KEGG_GRAFT_VERSUS_HOST_DISEASE                    | 37  | 0.694149021 | 1.787917407 | 0.001385042 | 0.011027659 | 0.007341315 | 5255 | tags=76%, list=21%, signal=60% | CD40LG/HLA-DQA2/CD28/HLA-E/CD86/HLA-DOB/HLA-C/HLA-DMA/HLA-DMB/HLA-DOA/HLA-DPA1/HLA-G/HLA-B/HLA-F/HLA-A/HLA-DPB1/HLA-DRA/CD80/FASLG/HLA-DRB1/IL2/PRF1/IL12B/IL10/TNF/HLA-DQB1/HLA-DQA1                                                                                                                                                                                                                                                                                                                                                                                   |
| KEGG_ALLOGRAFT_REJECTION                          | 35  | 0.73183931  | 1.866659265 | 0.001396648 | 0.011027659 | 0.007341315 | 4983 | tags=77%, list=20%, signal=62% | CD79A/CD19/TNFRSF13B/BTK/PTPRC/TNFRSF13C/CD3E/CD40LG/IL7R/CD3D/CD4/LCK/CD8B/ICOS/ZAP70/CD8A/AICDA/IL2RG                                                                                                                                                                                                                                                                                                                                                                                                                                                                 |
| KEGG_PRIMARY_IMMUNODEFICIENCY                     | 35  | 0.783243433 | 1.997772723 | 0.001396648 | 0.011027659 | 0.007341315 | 1748 | tags=51%, list=7%, signal=48%  |                                                                                                                                                                                                                                                                                                                                                                                                                                                                                                                                                                         |

|                                              |     |              |              |             |             |             |      |                                |                                                                                                                                                                                                                                                                                                                                                                                                                                                                                                                                                                                                                                                                                                                                                                                                                                                                                                                                                                                                                                                                                                                                                                                                                                                                                                                                                                                                                                                                                                                                                                                                                                                                                                                                                                                                                                                                                                                                                                        |
|----------------------------------------------|-----|--------------|--------------|-------------|-------------|-------------|------|--------------------------------|------------------------------------------------------------------------------------------------------------------------------------------------------------------------------------------------------------------------------------------------------------------------------------------------------------------------------------------------------------------------------------------------------------------------------------------------------------------------------------------------------------------------------------------------------------------------------------------------------------------------------------------------------------------------------------------------------------------------------------------------------------------------------------------------------------------------------------------------------------------------------------------------------------------------------------------------------------------------------------------------------------------------------------------------------------------------------------------------------------------------------------------------------------------------------------------------------------------------------------------------------------------------------------------------------------------------------------------------------------------------------------------------------------------------------------------------------------------------------------------------------------------------------------------------------------------------------------------------------------------------------------------------------------------------------------------------------------------------------------------------------------------------------------------------------------------------------------------------------------------------------------------------------------------------------------------------------------------------|
| KEGG_ASTHMA                                  | 28  | 0.741195043  | 1.818231914  | 0.001430615 | 0.011027659 | 0.007341315 | 4983 | tags=64%, list=20%, signal=51% | CD40LG/HLA-DQA2/HLA-DOB/CCL11/HLA-DMA/HLA-DMB/HLA-DOA/HLA-DPA1/FCER1G/HLA-DPB1/MS4A2/HLA-DRA/PRG2/HLA-DRB1/IL10/TNF/HLA-DQB1/HLA-DQA1<br>S1PR1/ADRA2A/P2RY8/P2RX5/S1PR4/GABRP/P2RY10/P2RY13/CNR2/CTSG/LPAR1/F2R/CYSLTR1/EDNRA/APLNR/EDNRB/P2RY14/FPR1/P2RX1/C3AR1/CALCRL/PTGER3/PTGER2/F2RL2/LEPR/P2RY11/FPR3/PTAFR/P2RX7/F2RL1/P2RY6/GIPR/VIPR1/PTGFR/GRIN3B/CHRNA1/HRH1/OXTR/PRSS3/ADORA2A/LTB4R2/GZMA/TBXA2R/F2RL3/SSTR3/LTB4R/OPRL1/GPR35/ADRB2/CNR1/TACR1/NR3C1/PTH1R/MC1R/GRID1/PTGDR/THRA/C5AR1/CHRN1/FPR2/GRIA3/GRIN3A/HRH2/ADORA3/GRIN2D/ADRA2C/NPY1R/GLRB/CYSLTR2/TSHR/NPFFR1/AVPR2/GRM5/AVPR1A/LPAR6/ADRB1/PTGER1<br>COL6A3/COL3A1/COL1A2/PDGFRB/ITGA4/MYL9/PRKCB/PARVG/THBS2/COL1A1/COL6A2/MYLK/PIK3CD/COL5A2/VAV1/LAMA4/PIK3CG/THBS1/COL6A1/TNC/ITGA1/TNXB/ITGB7/FYN/PIK3R5/COMP/ACTN1/VWF/LAMA2/VEGFC/IGF1/SHC2/ITGA11/RAC2/COL11A1/MAPK3/ITGA5/FN1/ITGA8/RAP1A/TLN1/CCND3/KDR/FLT4/ZYX/FLNC/COL5A3/VASP/PDGFC/LAMB2/PIK3R1/PARVB/SOS2/VAV3/PRKCA/DIAPH1/COL6A6/HGF/ROCK1/PDGFB/PDGFR/PTGFR/PTGFR2/RHOA/PARVA/ITGB3/RAPGEF1/ACTB/PAK2/ITGA9/GRB2/BCAR1/SHC1                                                                                                                                                                                                                                                                                                                                                                                                                                                                                                                                                                                                                                                                                                                                                                                                                                                                                              |
| KEGG_NEUROACTIVE_LIGAND_RECEPTOR_INTERACTION | 266 | 0.468512827  | 1.516013339  | 0.002134472 | 0.015794416 | 0.010514633 | 5438 | tags=29%, list=22%, signal=23% | SSBP1/MSH2/RFC3/RFC2/LIG1/RFC4/MSH6/EXO1/POLD2/PCNA/POLD1/RFC5<br>XRCC3/MUS81/RPA1/TOP3B/BRCA2/NBN/RAD51D/RPA3/BLM/SSBP1/RAD51C/RAD52/XRCC2/RAD54B/RAD54L/EME1/RAD51/POLD2/POLD1<br>POLR2G/POLR2J3/POLR1E/POLR3C/POLR2B/POLR2L/POLR3F/POLR3K/POLR2J2/POLR3D/POLR2E/POLR3A/POLR2J/POLR1B/POLR2K/POLR1C/POLR1D/POLR3B/POLR3H/POLR1A/POLR2D/POLR2F/POLR2I/POLR2H<br>APEX2/MUTYH/POLL/POLB/PARP1/POLE3/XRCC1/TDG/LIG3/SMUG1/POLE2/NEIL3/FEN1/LIG1/POLE/POLD2/NTHL1/PCNA/POLD1/UNG<br>TAF4/TAF11/GTF2E2/TAF6L/GTF2F1/TAF5L/GTF2H4/GTF2A2/TAF5/GTF2I/GTF2H1/TBP/TBPL1/GTF2F2/TAF4B/GTF2H3/GTF2IRD1<br>RPA3/POLA2/RNASEH1/SSBP1/MCM5/PRIM2/POLA1/POLE2/MCM6/PRIM1/FEN1/DNA2/MCM3/RFC3/RFC2/LIG1/POLE/RFC4/MCM7/POLD2/PCNA/POLD1/RFC5/MCM2/RNASEH2A/MCM4<br>AARS/AARS2/TARS2/DARS2/RARS/PSTK/RARS2/VARS/DARS/CARS2/IARS2/WARS2/EPRS/SARS/CARS/YARS/PARS2/NARS/MARS2/GARS/FARSB/IARS/TARS/MARS/FARSA/LARS/YARS2/EARS2/SARS2<br>GTF2H5/RBX1/DBP1/GTF2H4/CUL4A/RAD23B/CDK7/POLE3/RPA3/ERCC3/GTF2H1/DBP2/POLE2/GTF2H3/RAD23A/RFC3/RFC2/LIG1/POLE/RFC4/POLD2/PCNA/POLD1/RFC5<br>PSME4/PSMC2/POMP/PSMD12/PSMB5/PSMD4/PSME3/PSMA5/PSMB3/PSMC5/PSMA6/PSMA4/PSMD8/PSMB1/PSMC3/PSMB2/PSMD11/PSMB4/PSMD2/PSMA7/PSMA1/PSMA2/PSMD3/PSMB7/PSMD14/PSMC4<br>SKIV2L/CNOT4/LSM3/CNOT7/LSM1/EXOSC9/EXOSC1/EDC3/EXOSC7/PATL1/CNOT3/WDR61/XRN2/CNOT6/LSM6/LSM7/EXOSC2/PNPT1/HSPA9/LSM2/EXOSC4/ENO1/LSM5/ENO2/LSM4/EXOSC5/HSPD1<br>SESN1/CDKN1A/BBC3/CCND2/DBP2/FAS/EI24/BID/TP53/SFN/CHEK1/CCNE2/MDM2/STEAP3/GTSE1/GADD45A/TNFRSF10B/CYCS/CHEK2/RRM2/TP73/CCND1/CCNB1/CDK4/PERP/PMAIP1/CDK1/CCNB2<br>RPS15A/RPL3/RPS20/RPL30/RPL23A/RPS9/RPL28/RPL9/RPL22/RPL2/RPS23/RPL37/RPS27A/RPL10A/UBA52/RPL39/RSL24D1/RPL26L1/RPL12/RPL19/RPS2/RPL27A/RPL23/RPL27/RPL4/RPL7A/RPL36A/RPS13/RPS3/RPS11/RPL35/RPL7/RPS10/RPS8/RPL41/RPS28/MRPL13/RPL31/RPS4X/RPLP1/RPS3A/RPL38/RPS16/RPL8/RPL13A/RPL17/RPL18/RPL36/RPS18/RPL35A/RPS26/RPS12/RPL22L1/RPL18A/RPL37A/RPS15/RPS24/RPS7/RPL24/RPS21/RPS5/RPS19/RPLP0 |
| KEGG_FOCAL_ADHESION                          | 197 | 0.461085845  | 1.459695851  | 0.002219756 | 0.015794416 | 0.010514633 | 3715 | tags=37%, list=15%, signal=31% |                                                                                                                                                                                                                                                                                                                                                                                                                                                                                                                                                                                                                                                                                                                                                                                                                                                                                                                                                                                                                                                                                                                                                                                                                                                                                                                                                                                                                                                                                                                                                                                                                                                                                                                                                                                                                                                                                                                                                                        |
| KEGG_MISMATCH_REPAIR                         | 23  | -0.703948891 | -1.896726496 | 0.002873563 | 0.019689229 | 0.013107481 | 2467 | tags=57%, list=10%, signal=51% |                                                                                                                                                                                                                                                                                                                                                                                                                                                                                                                                                                                                                                                                                                                                                                                                                                                                                                                                                                                                                                                                                                                                                                                                                                                                                                                                                                                                                                                                                                                                                                                                                                                                                                                                                                                                                                                                                                                                                                        |
| KEGG_HOMOLOGOUS_RECOMBINATION                | 26  | -0.649811876 | -1.798685687 | 0.00304878  | 0.020143728 | 0.01341005  | 5259 | tags=77%, list=21%, signal=60% |                                                                                                                                                                                                                                                                                                                                                                                                                                                                                                                                                                                                                                                                                                                                                                                                                                                                                                                                                                                                                                                                                                                                                                                                                                                                                                                                                                                                                                                                                                                                                                                                                                                                                                                                                                                                                                                                                                                                                                        |
| KEGG_RNA_POLYMERASE                          | 29  | -0.643017111 | -1.794584315 | 0.003344482 | 0.020487265 | 0.013638748 | 6125 | tags=86%, list=25%, signal=65% |                                                                                                                                                                                                                                                                                                                                                                                                                                                                                                                                                                                                                                                                                                                                                                                                                                                                                                                                                                                                                                                                                                                                                                                                                                                                                                                                                                                                                                                                                                                                                                                                                                                                                                                                                                                                                                                                                                                                                                        |
| KEGG_BASE_EXCISION_REPAIR                    | 33  | -0.56956501  | -1.652580776 | 0.003460208 | 0.020487265 | 0.013638748 | 4644 | tags=64%, list=19%, signal=52% |                                                                                                                                                                                                                                                                                                                                                                                                                                                                                                                                                                                                                                                                                                                                                                                                                                                                                                                                                                                                                                                                                                                                                                                                                                                                                                                                                                                                                                                                                                                                                                                                                                                                                                                                                                                                                                                                                                                                                                        |
| KEGG_BASAL_TRANSCRIPTION_FACTORS             | 35  | -0.640821048 | -1.881168456 | 0.003496503 | 0.020487265 | 0.013638748 | 5100 | tags=51%, list=21%, signal=41% |                                                                                                                                                                                                                                                                                                                                                                                                                                                                                                                                                                                                                                                                                                                                                                                                                                                                                                                                                                                                                                                                                                                                                                                                                                                                                                                                                                                                                                                                                                                                                                                                                                                                                                                                                                                                                                                                                                                                                                        |
| KEGG_DNA_REPLICATION                         | 36  | -0.770098588 | -2.266655581 | 0.003584229 | 0.020487265 | 0.013638748 | 3375 | tags=75%, list=14%, signal=65% |                                                                                                                                                                                                                                                                                                                                                                                                                                                                                                                                                                                                                                                                                                                                                                                                                                                                                                                                                                                                                                                                                                                                                                                                                                                                                                                                                                                                                                                                                                                                                                                                                                                                                                                                                                                                                                                                                                                                                                        |
| KEGG_AMINOACYL_TRNA_BIOSYNTHESIS             | 41  | -0.671280404 | -2.019557464 | 0.003831418 | 0.020487265 | 0.013638748 | 4960 | tags=73%, list=20%, signal=58% |                                                                                                                                                                                                                                                                                                                                                                                                                                                                                                                                                                                                                                                                                                                                                                                                                                                                                                                                                                                                                                                                                                                                                                                                                                                                                                                                                                                                                                                                                                                                                                                                                                                                                                                                                                                                                                                                                                                                                                        |
| KEGG_NUCLEOTIDE_EXCISION_REPAIR              | 44  | -0.613224348 | -1.872606502 | 0.003846154 | 0.020487265 | 0.013638748 | 4759 | tags=57%, list=19%, signal=46% |                                                                                                                                                                                                                                                                                                                                                                                                                                                                                                                                                                                                                                                                                                                                                                                                                                                                                                                                                                                                                                                                                                                                                                                                                                                                                                                                                                                                                                                                                                                                                                                                                                                                                                                                                                                                                                                                                                                                                                        |
| KEGG_PROTEASOME                              | 43  | -0.645455604 | -1.960484601 | 0.003875969 | 0.020487265 | 0.013638748 | 4686 | tags=63%, list=19%, signal=51% |                                                                                                                                                                                                                                                                                                                                                                                                                                                                                                                                                                                                                                                                                                                                                                                                                                                                                                                                                                                                                                                                                                                                                                                                                                                                                                                                                                                                                                                                                                                                                                                                                                                                                                                                                                                                                                                                                                                                                                        |
| KEGG_RNA_DEGRADATION                         | 52  | -0.488481516 | -1.551407151 | 0.004065041 | 0.020889792 | 0.013906718 | 6049 | tags=54%, list=25%, signal=41% |                                                                                                                                                                                                                                                                                                                                                                                                                                                                                                                                                                                                                                                                                                                                                                                                                                                                                                                                                                                                                                                                                                                                                                                                                                                                                                                                                                                                                                                                                                                                                                                                                                                                                                                                                                                                                                                                                                                                                                        |
| KEGG_P53_SIGNALING_PATHWAY                   | 65  | -0.50297341  | -1.663776396 | 0.004444444 | 0.022222222 | 0.014793741 | 3226 | tags=45%, list=13%, signal=39% |                                                                                                                                                                                                                                                                                                                                                                                                                                                                                                                                                                                                                                                                                                                                                                                                                                                                                                                                                                                                                                                                                                                                                                                                                                                                                                                                                                                                                                                                                                                                                                                                                                                                                                                                                                                                                                                                                                                                                                        |
| KEGG_RIBOSOME                                | 85  | -0.795730299 | -2.795456505 | 0.004784689 | 0.023293881 | 0.015507164 | 3009 | tags=75%, list=12%, signal=66% |                                                                                                                                                                                                                                                                                                                                                                                                                                                                                                                                                                                                                                                                                                                                                                                                                                                                                                                                                                                                                                                                                                                                                                                                                                                                                                                                                                                                                                                                                                                                                                                                                                                                                                                                                                                                                                                                                                                                                                        |

|                                     |     |              |              |             |             |             |      |                                |                                                                                                                                                                                                                                                                                                                                                                                                                                                                                                                                                                           |
|-------------------------------------|-----|--------------|--------------|-------------|-------------|-------------|------|--------------------------------|---------------------------------------------------------------------------------------------------------------------------------------------------------------------------------------------------------------------------------------------------------------------------------------------------------------------------------------------------------------------------------------------------------------------------------------------------------------------------------------------------------------------------------------------------------------------------|
| KEGG_VIRAL_MYOCARDITIS              | 68  | 0.547347031  | 1.560708164  | 0.005121639 | 0.023874048 | 0.015893392 | 4983 | tags=56%, list=20%, signal=45% | ITGAL/CD40LG/ITGB2/HLA-DQA2/CD28/CD55/HLA-E/CD86/FYN/HLA-DOB/MYH11/HLA-C/LAMA2/HLA-DMA/HLA-DMB/HLA-DOA/HLA-DPA1/HLA-G/HLA-B/RAC2/HLA-F/HLA-A/HLA-DPB1/HLA-DRA/SGCB/CD80/HLA-DRB1/ACTB/SGCD/MYH10/CASP8/PRF1/EIF4G3/CASP9/SGCA/CAV1/HLA-DQB1/HLA-DQA1                                                                                                                                                                                                                                                                                                                      |
| KEGG_PYRIMIDINE_METABOLISM          | 98  | -0.518307527 | -1.853248488 | 0.005208333 | 0.023874048 | 0.015893392 | 3556 | tags=48%, list=14%, signal=41% | POLR2J2/POLR3D/POLE3/POLR2E/ENTPD6/POLR3A/POLA2/POLR2J/CANT1/CTPS2/POLR1B/POLR2K/UCLL1/POLR1C/POLR1D/PRIM2/UMPS/POLR3B/POLA1/POLE2/PNPT1/POLR3H/POLR1A/DCTD/NME1-NME2/NME4/POLR2D/POLR2F/PRIM1/RRM1/UCLL2/POLR2I/DUT/CAD/POLR2H/POLE/NT5M/RRM2/CTPS1/TYMS/POLD2/NME2/POLD1/DTYMK/NME1/TK1                                                                                                                                                                                                                                                                                 |
| KEGG_OXIDATIVE_PHOSPHORYLATION      | 101 | -0.488252151 | -1.761012739 | 0.005291005 | 0.023874048 | 0.015893392 | 5569 | tags=62%, list=23%, signal=48% | NDUFB2/NDUFV2/COX8A/ATP6V1E1/COX10/COX15/NDUFS1/NDUFC1/NDUFA3/SDHB/UQCRB/UQCRC1/NDUFB6/NDUFA2/COX4I1/NDUFS7/NDUFB10/NDUFB5/NDUFS3/NDUFA1/NDUFS2/NDUFA5/UQCRC2/UQCR10/ATP6V1C2/COX7C/COX5A/COX11/NDUFA10/NDUFA6/PPA1/PPA2/NDUFA8/NDUFB3/ATP6V1E2/UQCR11/NDUFA4/NDUFAB1/NDUFS4/UQCRFS1/NDUFA11/UQCRQ/COX7A2L/COX6C/NDUFS5/COX7A2/COX17/COX5B/NDUFB4/COX7B/NDUFB7/COX6B1/NDUFA7/COX6A1/NDUFS6/NDUFS8/NDUFV1/NDUFA9/CYC1/UQCRH/NDUFB9/COX6B2                                                                                                                                  |
| KEGG_PARKINSONS_DISEASE             | 99  | -0.532047382 | -1.888270426 | 0.005434783 | 0.023938923 | 0.015936581 | 5569 | tags=65%, list=23%, signal=50% | NDUFB2/NDUFV2/COX8A/GPR37/PARK7/NDUFS1/NDUFC1/NDUFA3/SDHB/UQCRB/UQCRC1/NDUFB6/NDUFA2/COX4I1/NDUFS7/NDUFB10/NDUFB5/NDUFS3/NDUFA1/NDUFS2/NDUFA5/UQCRC2/UQCR10/PPID/VDAC3/COX7C/UBE2L3/COX5A/SLC25A4/NDUFA10/NDUFA6/NDUFA8/NDUFB3/UQCR11/SLC25A5/NDUFA4/NDUFAB1/NDUFS4/UQCRFS1/UQCRQ/COX7A2L/COX6C/NDUFS5/COX7A2/COX5B/NDUFB4/COX7B/NDUFB7/COX6B1/VDAC2/NDUFA7/COX6A1/SLC25A6/NDUFS6/VDAC1/NDUFS8/NDUFV1/NDUFA9/CYCS/CYC1/UQCRH/NDUFB9/COX6B2                                                                                                                                |
| KEGG_UBIQUITIN_MEDIATED_PROTEOLYSIS | 130 | -0.432094801 | -1.598048922 | 0.00625     | 0.026353276 | 0.01754386  | 6106 | tags=51%, list=25%, signal=38% | BTRC/FBXW11/STUB1/UBE2G2/UBE2J2/UBA1/HUWE1/UBE2F/RNF7/UBE2B/FBXO4/BIRC3/PIAS1/UBOX5/AIRE/UBE4B/RBX1/UBE2N/CUL1/UBE2K/ANAPC10/CUL2/DDB1/FZR1/PIAS2/UBE2W/UBE2D4/PIAS4/TRIM37/SMURF1/CUL4A/SKP1/FANCL/CDC23/UBE2L3/ANAPC1/UBE3B/UBE20/UBE3C/SAE1/ANAPC5/CUL7/UBE3A/UBE2E3/CDC34/PRPF19/UBE2Z/FBXW8/ANAPC7/DDB2/HERC2/ANAPC11/KEAP1/UBE2M/MDM2/UBA2/BRCA1/KLHL13/NEDD4L/SKP2/CDC20/CBLC/UBE2S/SOCS1/UBE2C                                                                                                                                                                    |
| KEGG_CELL_CYCLE                     | 124 | -0.603265139 | -2.210454942 | 0.006329114 | 0.026353276 | 0.01754386  | 4497 | tags=62%, list=18%, signal=51% | MAD1L1/CUL1/ANAPC10/HDAC1/ORC3/FZR1/SMAD4/ORC2/E2F5/SKP1/SMAD3/SMC3/CDK7/CCNE1/YWHAQ/ORC4/DBF4/E2F2/CDK2/BUB3/CDC23/ANAPC1/CDKN1A/RAD21/ANAPC5/RBL1/YWHAQ/ORC5/MCM5/CDC7/SMC1A/CCND2/ANAPC7/YWHAG/BUB1/ANAPC11/TFDP1/TP53/MCM6/SFN/CHEK1/CCNE2/HDAC2/MDM2/ORC6/MCM3/GADD45A/CDC25C/PLK1/ORC1/PKMYT1/CCNA2/PRKDC/CDC25A/ESPL1/MYC/BUB1B/TTK/SKP2/WEE1/CHEK2/MCM7/CCND1/CDC20/PCNA/PTTG1/CCNB1/CDK4/MCM2/MCM4/E2F1/CDK1/CCNB2/MAD2L1/CDK6/CDC45                                                                                                                             |
| KEGG_SPLICEOSOME                    | 123 | -0.658269234 | -2.40118824  | 0.006410256 | 0.026353276 | 0.01754386  | 6126 | tags=72%, list=25%, signal=55% | PLRG1/DDX39B/SNRPB2/PRPF3/SNRNP200/XAB2/LSM3/BCAS2/HNRNPC/RBM8A/NCBP1/HNRNPU/CRNKL1/PP1E/CTNBL1/HNRNPA3/TRA2A/TCERG1/RBM17/DDX23/SART1/SRSF10/DDX46/SF3B5/PP1L1/SMNDC1/U2AF1/SF3B4/TRA2B/DHX15/THOC1/SF3A3/SNRNP70/PRPF6/THOC2/PRPF4/SRSF1/EIF4A3/LSM6/HNRNPM/ISY1/RBMX/PQBP1/SNRNP40/FTUD2/DDX42/PP1H/SRSF7/PRPF40A/SRSF3/U2AF2/BUD31/NCBP2/SF3B2/MAGO8/PRPF19/SRSF2/SNRPA1/SRSF6/SRSF9/PRPF31/PUF60/CHERP/LSM7/SNRPC/SF3A2/SNRPG/WBP11/USP39/U2SURP/HNRNPA1/LSM2/PHF5A/SNRPB/SNRPD3/TXNL4A/ALYREF/SNRPA/LSM5/SNRPD1/SNRPE/HSPA1B/THOC3/PRPF40B/LSM4/SNRPD2/MAGO8B/SNRPF |
| KEGG_TYPE_I_DIABETES_MELLITUS       | 41  | 0.61816036   | 1.623641832  | 0.006747638 | 0.027137241 | 0.018065759 | 4410 | tags=63%, list=18%, signal=52% | HLA-DQA2/CD28/HLA-E/CD86/LTA/HLA-DOB/PTPRN2/HLA-C/HLA-DMA/HLA-DMB/HLA-DOA/HLA-DPA1/HLA-G/HLA-B/HLA-F/HLA-A/HLA-DPB1/CPE/HLA-DRA/CD80/FASLG/HLA-DRB1/IL2/PRF1/IL12B/TNF                                                                                                                                                                                                                                                                                                                                                                                                    |

|                                                    |     |              |              |             |             |             |      |                                |                                                                                                                                                                                                                                                                                                                                                                                                                                                                                                                                                                                                                                                                                                     |
|----------------------------------------------------|-----|--------------|--------------|-------------|-------------|-------------|------|--------------------------------|-----------------------------------------------------------------------------------------------------------------------------------------------------------------------------------------------------------------------------------------------------------------------------------------------------------------------------------------------------------------------------------------------------------------------------------------------------------------------------------------------------------------------------------------------------------------------------------------------------------------------------------------------------------------------------------------------------|
| KEGG_ALZHEIMERS_DISEASE                            | 145 | -0.390345951 | -1.474949332 | 0.007194245 | 0.028317771 | 0.01885166  | 5569 | tags=53%, list=23%, signal=41% | NDUFB2/APH1A/PLCB3/NDUFV2/COX8A/CAPN1/IL1B/CALML6/IDE/NDUFS1/ATP2A2/NDUFC1/NDUFA3/SDHB/UQCRB/UQCRC1/NDUFB6/NDUFA2/COX4I1/NDUFS7/NDUFB10/NDUFB5/NDUFS3/NDUFA1/NDUFS2/MAPT/CALML3/NDUFA5/APP/UQCRC2/UQCR10/LPL/HSD17B10/PLCB1/COX7C/COX5A/NDUFA10/NDUFA6/PPP3R1/NDUFA8/CDK5/NDUFB3/RYR3/UQCR11/FADD/NDUFA4/FAS/GRIN2A/NDUFAB1/BID/NDUFS4/UQCRFS1/UQCRQ/COX7A2L/COX6C/NDUFS5/COX7A2/COX5B/NDUFB4/ITPR3/COX7B/NDUFB7/BAD/COX6B1/NDUFA7/COX6A1/NDUFS6/NDUFS8/NDUFV1/NDUFA9/CYCS/CYC1/UQCRH/NDUFB9/GAPDH/COX6B2PLCG2/PTPRC/PRKCB/NCF1/WAS/PIK3CD/VAV1/FCGR2B/PIK3CG/LAT/LYN/DOCK2/PIK3R5/SCIN/INPP5D/FCGR2C/ARPC1B/PRKCD/RAC2/GAB2/MAPK3/FCGR1A/VASP/PIK3R1/FCGR3A/MARCKS/VAV3/SPHK1/WASF3/DNM1/PRKCA/GSN |
| KEGG_FC_GAMMA_R_MEDIATED_PHAGOCYTOSIS              | 93  | 0.511510987  | 1.504936957  | 0.007434944 | 0.028655514 | 0.019076502 | 2858 | tags=34%, list=12%, signal=31% | FUCA1/FUCA2/GBA/HEXA/NEU1/MAN2B2/HEXB/GLB1/MAN2B1/ENGASE                                                                                                                                                                                                                                                                                                                                                                                                                                                                                                                                                                                                                                            |
| KEGG_OTHER_GLYCAN_DEGRADATION                      | 16  | 0.74202667   | 1.601876183  | 0.008169935 | 0.030327869 | 0.020189819 | 5266 | tags=62%, list=21%, signal=49% | NDUFC1/POLR2L/TAF4/NDUFA3/SDHB/UQCRB/UQCRC1/NDUFB6/HDAC1/NDUFA2/COX4I1/NDUFS7/NDUFB10/NDUFB5/NDUFS3/NDUFA1/NDUFS2/NDUFA5/AP2A1/SP1/UQCRC2/UQCR10/PPID/VDAC3/POLR2J2/POLR2E/PLCB1/COX7C/COX5A/SLC25A4/NDUFA10/NDUFA6/DCTN2/POLR2J/AP2S1/TBP/BBC3/POLR2K/NDUFA8/TFAM/NDUFB3/TBPL1/UQCR11/SLC25A5/TAF4B/NDUFA4/DNAL4/NDUFAB1/CLTB/NDUFS4/BDNF/UQCRFS1/UQCRQ/COX7A2L/COX6C/TP53/SOD1/NDUFS5/COX7A2/POLR2D/COX5B/POLR2F/NDUFB4/HDAC2/COX7B/NDUFB7/COX6B1/VDAC2/NDUFA7/COX6A1/SLC25A6/NDUFS6/VDAC1/NDUFS8/NDUFV1/POLR2I/NDUFA9/POLR2H/CYCS/CYC1/UQCRH/NDUFB9/COX6B2                                                                                                                                       |
| KEGG_HUNTINGTONS_DISEASE                           | 160 | -0.459299355 | -1.76893552  | 0.008196721 | 0.030327869 | 0.020189819 | 4847 | tags=52%, list=20%, signal=42% | CTSK/LY96/TLR7/TLR9/PIK3CD/CXCL9/TLR4/PIK3CG/TLR8/CD86/PIK3R5/CD14/FOS/IRF7/MAPK3/MYD88/MAP3K8/STAT1/IFNAR2/PIK3R1/CXCL11/CD80/TLR2/TICAM2/IFNAR1/CCL5/IRF5/MAP2K3/MAPK14/RIPK1/TLR1/TLR6/CASP8/IL12B/TNF/AKT1/IRAK4/TIRAP/TRAF3                                                                                                                                                                                                                                                                                                                                                                                                                                                                    |
| KEGG_TOLL LIKE RECEPTOR SIGNALING PATHWAY          | 101 | 0.498584879  | 1.478670271  | 0.008610086 | 0.031232665 | 0.020792158 | 5003 | tags=39%, list=20%, signal=31% | PIAS2/PIAS4/COL4A6/RELA/RXRA/CCNE1/E2F2/ITGA2/CDK2/LAMC2/COL4A2/TP53/PIK3CB/CCNE2/TRAF2/LAMB1/ITGA6/PIK3R2/BCL2/TRAF4/LAMA3/LAMB3/NFKBIA/PTK2/CYCS/MYC/SKP2/CCND1/CKS1B/CDK4/E2F1/LAMA5/ITGAV/PTGS2                                                                                                                                                                                                                                                                                                                                                                                                                                                                                                 |
| KEGG_SMALL_CELL_LUNG_CANCER                        | 84  | -0.422265999 | -1.482718258 | 0.00952381  | 0.033882784 | 0.022556391 | 4155 | tags=42%, list=17%, signal=35% | PLA2G2D/PLCG2/BTK/PRKCB/PIK3CD/VAV1/PIK3CG/LAT/FYN/LYN/PIK3R5/LCP2/PLA2G2A/INPP5D/PRKCD/RAC2/GAB2/MAPK3/FCER1G/MS4A2/PIK3R1/SOS2/VAV3/PRKCA/PLA2G10/MAP2K3/MAPK14/GRB2/SYK                                                                                                                                                                                                                                                                                                                                                                                                                                                                                                                          |
| KEGG_FC_EPSILON_RI_SIGNALING_PATHWAY               | 79  | 0.524996285  | 1.524102046  | 0.010050251 | 0.035081066 | 0.023354109 | 3760 | tags=37%, list=15%, signal=31% | IL10RA/IL7R/PIK3CD/PTPN6/IRF9/PIK3CG/STAT4/PIK3R5/PIM1/IL21R/IL2RB/IL3RA/IL6R/IL12RB1/CSF2RA/STAT5B/CSF3R/LEPR/IL2RG/IFNLR1/IL5RA/CLCF1/IL9R/CCND3/STAT1/IL2RA/IFNAR2/CBL/CSF2RB/PIK3R1/JAK1/IL6ST/IL4R/SOS2/IFNAR1/IL21/IL10RB/CNTF/STAT5A/IL12RB2/CISH/GRB2/IL24/IL2/CBLB/JAK3/SPRY1/C                                                                                                                                                                                                                                                                                                                                                                                                            |
| KEGG_JAK_STAT_SIGNALING_PATHWAY                    | 154 | 0.458437416  | 1.427214701  | 0.010344828 | 0.035440613 | 0.023593466 | 4550 | tags=36%, list=19%, signal=29% | TF1/IL12B/IL10/OSM/IL7/IL22RA2/SOCS3/AKT1                                                                                                                                                                                                                                                                                                                                                                                                                                                                                                                                                                                                                                                           |
| KEGG_CYSTEINE_AND_METHIONINE_METABOLISM            | 34  | -0.536499986 | -1.569000809 | 0.010600707 | 0.035656923 | 0.023737468 | 3958 | tags=68%, list=16%, signal=57% | AHCYL1/MTR/GOT2/LDHC/AMD1/SRM/LDHB/DNMT3B/DNMT3L/MAT1A/APIP/ADI1/MAT2A/SMS/DNMT1/DNMT3A/ENOPH1/MPST/GOT1/CBS/LDHA/AHCY                                                                                                                                                                                                                                                                                                                                                                                                                                                                                                                                                                              |
| KEGG_GLYCOSPHINGOLIPID_BIOSYNTHESIS_GANGLIO_SERIES | 15  | 0.740204794  | 1.571910849  | 0.012965964 | 0.042833989 | 0.028515373 | 4252 | tags=73%, list=17%, signal=61% | ST6GALNAC4/ST3GAL5/ST6GALNAC6/B3GALT4/ST3GAL1/ST6GALNAC5/HEXA/ST6GALNAC3/HEXB/GLB1/ST3GAL2                                                                                                                                                                                                                                                                                                                                                                                                                                                                                                                                                                                                          |
| KEGG_PURINE_METABOLISM                             | 151 | -0.372369533 | -1.424783249 | 0.014285714 | 0.046365915 | 0.03086664  | 3891 | tags=37%, list=16%, signal=31% | NT5C/HPRT1/POLR3K/POLR2J2/POLR3D/ADCY3/POLE3/POLR2E/ENTPD6/POLR3A/PAPS1/DGUOK/POLA2/POLR2J/CANT1/POLR1B/POLR2K/IMPDH2/AK2/PKM/POLR1C/POLR1D/PRIM2/ADSL/PDE9A/POLR3B/POLA1/POLE2/PNPT1/POLR3H/POLR1A/NME1-NME2/NME4/GART/ADK/PPAT/POLR2D/POLR2F/ADCY10/PRIM1/RRM1/GMPS/POLR2I/AK4/ATIC/POLR2H/POLE/PAICS/NT5M/RRM2/POLD2/NME2/POLD1/NME1/PAPSS2                                                                                                                                                                                                                                                                                                                                                      |
| KEGG_ECM_RECEPTOR_INTERACTION                      | 83  | 0.508055175  | 1.475058125  | 0.015151515 | 0.048328109 | 0.032172909 | 2267 | tags=33%, list=9%, signal=30%  | COL6A3/COL3A1/COL1A2/ITGA4/THBS2/COL1A1/COL6A2/COL5A2/LAMA4/THBS1/COL6A1/TNC/ITGA1/TNXB/ITGB7/GP1BA/COMP/VWF/LAMA2/ITGA11/COL11A1/ITGA5/FN1/ITGA8/COL5A3/LAMB2/CD36                                                                                                                                                                                                                                                                                                                                                                                                                                                                                                                                 |

Gene set enrichment analysis (GSEA) for ZNF667-AS1 using GSE12452.

| ID                                  | setSize | enrichmentScore | NES          | pvalue      | p.adjust    | qvalues     | rank | leading edge                   | core enrichment                                                                                                                                                                                                                                                                                                                                                                                                                                                                                                                                                                                                                                                                                                                                                                                                                                                                                                                                                                                                                                                                                                                                                                                                                                                                                                                                                                                                                                                                                                                                                                                                                                                                                                                                                                                                                                                                                                                                                                                                                                                                                                                                                                                                                                                                                                                                                                                                                                                                                                                                                                                                                                                                                                                                                                                           |
|-------------------------------------|---------|-----------------|--------------|-------------|-------------|-------------|------|--------------------------------|-----------------------------------------------------------------------------------------------------------------------------------------------------------------------------------------------------------------------------------------------------------------------------------------------------------------------------------------------------------------------------------------------------------------------------------------------------------------------------------------------------------------------------------------------------------------------------------------------------------------------------------------------------------------------------------------------------------------------------------------------------------------------------------------------------------------------------------------------------------------------------------------------------------------------------------------------------------------------------------------------------------------------------------------------------------------------------------------------------------------------------------------------------------------------------------------------------------------------------------------------------------------------------------------------------------------------------------------------------------------------------------------------------------------------------------------------------------------------------------------------------------------------------------------------------------------------------------------------------------------------------------------------------------------------------------------------------------------------------------------------------------------------------------------------------------------------------------------------------------------------------------------------------------------------------------------------------------------------------------------------------------------------------------------------------------------------------------------------------------------------------------------------------------------------------------------------------------------------------------------------------------------------------------------------------------------------------------------------------------------------------------------------------------------------------------------------------------------------------------------------------------------------------------------------------------------------------------------------------------------------------------------------------------------------------------------------------------------------------------------------------------------------------------------------------------|
| KEGG_PATHWAYS_IN_CANCER             | 319     | -0.409967305    | -1.656121601 | 0.001567398 | 0.013814217 | 0.008646167 | 3932 | tags=27%, list=18%, signal=22% | HIF1A/RAC1/WNT10B/CRK/NFKBIA/CCDC6/STAT1/CDK6/PTCH1/CDKN1B/CRKL/SOS1/EP300/TPR/KRAS/BIRC2/LAMC2/SMAD2/PIK3CA/EGLN1/TP53/RBX1/WNT2/TFG/BRCA2/JUN/BIRC3/CDKN1A/MDM2/PIK3CB/PTEN/IGF1R/ITGB1/SMAD4/KITLG/HSP90B1/HDAC1/FAS/MAPK8/PTK2/VEGFA/RALA/BCL2/RAD51/FGF1/SKP2/GSTP1/FZD3/FH/CHUK/AKT3/E2F3/MSH6/HSP90AB1/ITGA6/LAMC1/CYCS/BIRC5/BID/FZD6/FADD/HDAC2/CUL2/FGF2/ITGAV/NRAS/LAMA1/CCNE2/MSH2/LAMB3/ARNT2/CKS1B/COL4A2/CDK4/PTGS2/CXCL8/BMP2/WNT5A/COL4A1/MYC/FZD7/FN1/KIT/LAMB1/MMP1<br>ROCK2/RAC1/CRK/FLNA/KDR/ITGA1/CRKL/SOS1/BIRC2/DOCK1/LAMC2/PIK3CA/COL6A6/PPP1R12A/JUN/VCL/BIRC3/PDGFRC/PIK3CB/PTEN/PAK3/IGF1R/ITGB8/ITGB1/RAP1B/MAPK8/PTK2/VEGFA/THBS4/BCL2/AKT3/CAV2/PPP1CC/ITGA6/LAMC1/CCND2/CAV1/ITGAV/COL11A1/COL5A1/COL1A1/THBS2/LAMA1/COL6A3/LAMB3/IBSP/COL4A2/COL1A2/COL4A1/COL3A1/FN1/SPP1/COL5A2/LAMB1<br>PDE6D/POLR2G/PRPS1/POLR2F/DGUOK/PDE8A/POLR3C/POLR2I/POLR3G/PKM/RRM2B/POLD1/PRIM2/PNP/NT5M/DCK/POLR3F/POLR1D/PRPS2/NUDT9/AK4/POLR2B/POLE3/PFAS/GART/POLD2/NUDT5/ADK/AK2/POLR1B/NME4/NT5C3A/POLR2K/HPRT1/GMPS/POLR1C/POLA1/RRM1/POLE2/POLR2D/POLR2H/PRIM1/ADSL/ATIC/PAICS/PPAT/PNPT1/PAPSS2/RRM2/ADA/NME1<br>YWHAH/YWHAZ/RBL1/SKP1/CDK6/MCM5/CDKN1B/EP300/CDK7/SMAD2/SMC1A/TFDP2/TP53/RBX1/CDKN1A/MDM2/STAG2/BUB1/YWHAE/SMAD4/TFDP1/CDC25B/ANAPC1/BUB3/CUL1/CCNB2/HDAC1/CDC27/CHEK1/ANAPC7/WEE1/RAD21/ANAPC10/CDC23/ANAPC5/YWHAQ/ESPL1/SKP2/ORC5/ORC4/ORC1/ORC6/E2F3/ATR/MCM4/CCND2/CDC25A/HDAC2/ORC2/YWHAG/CDC20/E2F5/ORC3/MCM6/CCNA2/GADD45A/PRKDC/CHEK2/CCNE2/MCM7/MCM3/PTTG1/MCM2/CDC7/CDC45/CDK1/PCNA/CDC6/CDK4/DBF4/MYC/MAD2L1/TTK/BU<br>B1B/CCNB1<br>CDC16/UBE2E2/PML/PRPF19/ANAPC13/UBE2R2/UBE2E1/UBE2Q1/TRIM37/UBE2M/CUL4B/MID1/CBLB/PIAS4/UBE2D1/KLHL9/HERC4/FBXW11/UBE2G2/ANAPC11/PIAS1/PIAS2/KEAP1/UBE2I/UBE2B/SAE1/UBE3C/UBA3/CUL4A/SKP1/UBA6/RNF7/TRIP12/UBE2N/BIRC2/UBE3A/UBE2L6/UBR5/UBE2QL1/RBX1/UBE2K/SOCS1/UBE2Z/HERC2/BIRC3/UBE2W/FBXW7/MDM2/UBE2L3/DDB2/UBE2G1/UBE2D2/ANAPC1/RCHY1/CUL1/CDC27/ANAPC7/ANAPC10/CDC23/ANAPC5/WWP1/SKP2/UBE2F/UBA2/BRCA1/BIRC6/NEDD4L/NEDD4/CUL2/CDC20/UBE2E3/FANCL/KLHL13/UBE2C<br>PRPF31/SNRNP27/DHX16/LSM4/DDX42/SF3B1/CDC40/LSM3/SF3A2/DDX5/EFTUD2/PP1H/PRPF38A/TRA2B/SNRNP40/PRPF4/SNRPB2/SNRPC/SF3B6/HNRNPC/DDX46/PRPF38B/TCERG1/TRA2A/SRSF1/SF3B4/PLRG1/AQR/USP39/SRSF6/NCBP1/THOC2/RBMX/HNRNPU/DDX23/EIF4A3/SRSF3/SRSF7/SMNDC1/PRPF40A/PPIL1/SNRPA/SNRPB/PHF5A/BCAS2/HNRNPA3/NCBP2/LSM7/SNRPA1/PRPF3/LSM6/LSM8/SF3A3/DHX15/SNRPD2/LSM2/SNRPD3/SRSF9/WBP11/MAGOH/TXNL4A/SNRPE/SRSF2/SNRPG/HNRNPA1/SRSF10/CRNKL1/THOC1/ALYREF/SNRPF/U2SURP/MAGOH/SNRPD1/LSM5<br>UPP1/POLR3C/POLR2I/DTYMK/POLR3G/TYMP/RRM2B/POLD1/PRIM2/PNP/NT5M/DCK/C<br>TPS2/POLR3F/POLR1D/POLR2B/UMPS/POLE3/POLD2/POLR1B/NME4/NT5C3A/POLR2K/<br>POLR1C/DCTD/POLA1/RRM1/POLE2/POLR2D/CMPK2/UCK2/AK3/POLR2H/DUT/PRIM1/T<br>K1/TYMS/PNPT1/RRM2/CTPS1/NME1 |
| KEGG_FOCAL_ADHESION                 | 196     | -0.434579023    | -1.674098484 | 0.00170068  | 0.013814217 | 0.008646167 | 3981 | tags=28%, list=19%, signal=23% |                                                                                                                                                                                                                                                                                                                                                                                                                                                                                                                                                                                                                                                                                                                                                                                                                                                                                                                                                                                                                                                                                                                                                                                                                                                                                                                                                                                                                                                                                                                                                                                                                                                                                                                                                                                                                                                                                                                                                                                                                                                                                                                                                                                                                                                                                                                                                                                                                                                                                                                                                                                                                                                                                                                                                                                                           |
| KEGG_PURINE_METABOLISM              | 149     | -0.475619965    | -1.794410551 | 0.001718213 | 0.013814217 | 0.008646167 | 3613 | tags=35%, list=17%, signal=29% |                                                                                                                                                                                                                                                                                                                                                                                                                                                                                                                                                                                                                                                                                                                                                                                                                                                                                                                                                                                                                                                                                                                                                                                                                                                                                                                                                                                                                                                                                                                                                                                                                                                                                                                                                                                                                                                                                                                                                                                                                                                                                                                                                                                                                                                                                                                                                                                                                                                                                                                                                                                                                                                                                                                                                                                                           |
| KEGG_CELL_CYCLE                     | 123     | -0.684992958    | -2.509617213 | 0.00174216  | 0.013814217 | 0.008646167 | 3981 | tags=62%, list=19%, signal=51% |                                                                                                                                                                                                                                                                                                                                                                                                                                                                                                                                                                                                                                                                                                                                                                                                                                                                                                                                                                                                                                                                                                                                                                                                                                                                                                                                                                                                                                                                                                                                                                                                                                                                                                                                                                                                                                                                                                                                                                                                                                                                                                                                                                                                                                                                                                                                                                                                                                                                                                                                                                                                                                                                                                                                                                                                           |
| KEGG_UBIQUITIN_MEDIATED_PROTEOLYSIS | 128     | -0.512255002    | -1.890791791 | 0.001760563 | 0.013814217 | 0.008646167 | 5723 | tags=59%, list=27%, signal=43% |                                                                                                                                                                                                                                                                                                                                                                                                                                                                                                                                                                                                                                                                                                                                                                                                                                                                                                                                                                                                                                                                                                                                                                                                                                                                                                                                                                                                                                                                                                                                                                                                                                                                                                                                                                                                                                                                                                                                                                                                                                                                                                                                                                                                                                                                                                                                                                                                                                                                                                                                                                                                                                                                                                                                                                                                           |
| KEGG_SPLICEOSOME                    | 121     | -0.706658359    | -2.577274513 | 0.001763668 | 0.013814217 | 0.008646167 | 3873 | tags=62%, list=18%, signal=51% |                                                                                                                                                                                                                                                                                                                                                                                                                                                                                                                                                                                                                                                                                                                                                                                                                                                                                                                                                                                                                                                                                                                                                                                                                                                                                                                                                                                                                                                                                                                                                                                                                                                                                                                                                                                                                                                                                                                                                                                                                                                                                                                                                                                                                                                                                                                                                                                                                                                                                                                                                                                                                                                                                                                                                                                                           |
| KEGG_PYRIMIDINE_METABOLISM          | 95      | -0.575030315    | -2.016658973 | 0.001766784 | 0.013814217 | 0.008646167 | 3074 | tags=44%, list=14%, signal=38% |                                                                                                                                                                                                                                                                                                                                                                                                                                                                                                                                                                                                                                                                                                                                                                                                                                                                                                                                                                                                                                                                                                                                                                                                                                                                                                                                                                                                                                                                                                                                                                                                                                                                                                                                                                                                                                                                                                                                                                                                                                                                                                                                                                                                                                                                                                                                                                                                                                                                                                                                                                                                                                                                                                                                                                                                           |



|                                                   |    |              |              |             |             |             |      |                                |                                                                                                                                                                                                                                                                                                                                                                        |
|---------------------------------------------------|----|--------------|--------------|-------------|-------------|-------------|------|--------------------------------|------------------------------------------------------------------------------------------------------------------------------------------------------------------------------------------------------------------------------------------------------------------------------------------------------------------------------------------------------------------------|
| KEGG_PARKINSONS_DISEASE                           | 98 | -0.540984303 | -1.905747412 | 0.001776199 | 0.013814217 | 0.008646167 | 4921 | tags=56%, list=23%, signal=43% | PPID/SNCAIP/NDUFC2/UBE2G2/SDHC/NDUFS4/NDUFB3/SDHB/COX6A1/CASP3/NDUFB10/NDUFV2/NDUFA7/VDAC3/NDUFA1/SLC25A5/COX6B1/NDUFB6/NDUFV1/UQCRB/UBE2L6/UQCRQ/COX5B/GPR37/COX5A/NDUFB5/NDUFA6/COX7C/NDUFA5/NDUFB4/UBE2L3/COX7B/COX7A2L/NDUFA4/NDUFV3/NDUFS2/UBE2G1/COX7A2/NDUFS8/VDAC2/NDUFAB1/PARK7/NDUFS6/COX6C/UQCRC2/VDAC1/UQCRFS1/NDUFA8/NDUFS5/CYCS/UQCRH/CYC1/NDUFB9/NDUFA9 |
| KEGG_RNA_DEGRADATION                              | 53 | -0.636311663 | -2.057256188 | 0.001808318 | 0.013814217 | 0.008646167 | 4073 | tags=58%, list=19%, signal=47% | PATL1/EXOSC4/LSM1/LSM4/CNOT6/PAPOLG/EXOSC2/LSM3/TTC37/ZCCHC7/C1D/DIS3/EXOSC3/EXOSC9/ENO2/WDR61/PARN/CNOT7/EXOSC5/ENO1/EXOSC8/HSPA9/LSM7/XRN2/LSM6/LSM8/LSM2/HSPD1/LSM5/PNPT1                                                                                                                                                                                           |
| KEGG_CYSTEINE_AND_METHIONINE_METABOLISM           | 33 | -0.659471928 | -1.956417798 | 0.001821494 | 0.013814217 | 0.008646167 | 4637 | tags=55%, list=22%, signal=43% | LDHC/SDS/SRM/GOT1/DNMT3B/ADI1/IL4I1/MAT2A/APIP/DNMT1/AMD1/SMS/ENOPH1/MTR/AHCY/LDHA/LDHB                                                                                                                                                                                                                                                                                |
| KEGG_AMINOACYL_TRNA_BIOSYNTHESIS                  | 41 | -0.687863796 | -2.147688858 | 0.001834862 | 0.013814217 | 0.008646167 | 3338 | tags=56%, list=16%, signal=47% | TARSL2/WARS2/EPRS/HARS2/FARSA/MTFMT/SARS/NARS/RARS/EARS2/YARS/MARS2/TARS/IARS2/LARS/FARSB/MARS/GARS/IARS/DARS/YARS2/NARS2                                                                                                                                                                                                                                              |
| KEGG_PROTEASOME                                   | 41 | -0.747410863 | -2.33361022  | 0.001834862 | 0.013814217 | 0.008646167 | 3998 | tags=78%, list=19%, signal=64% | IFNG/PSMD4/PSMD3/PSME1/PSMB6/PSMB1/PSME2/PSMB7/PSMA3/PSMB4/PSMD13/PSME4/PSMC3/PSMD8/PSME3/PSMC5/PSMD2/PSMD1/PSMD11/PSMB5/PSMC4/POMP/PSMA5/PSMC2/PSMA7/PSMA2/PSMB3/PSMD14/PSMA4/PSMD12/PSMA1                                                                                                                                                                            |
| KEGG_P53_SIGNALING_PATHWAY                        | 67 | -0.594368599 | -1.982317917 | 0.001841621 | 0.013814217 | 0.008646167 | 3410 | tags=43%, list=16%, signal=36% | BBC3/TP53/SERPINE1/IGFBP3/CDKN1A/MDM2/PTEN/RRM2B/EI24/DDB2/RCHY1/CCNB2/FAS/CHEK1/SESNI/ATR/CYCS/CCND2/BID/CCNG1/GADD45A/CHEK2/CCNE2/CDK1/CDK4/RRM2/CCNB1/PMAIP1                                                                                                                                                                                                        |
| KEGG_BASAL_TRANSCRIPTION_FACTORS                  | 31 | -0.644653418 | -1.876642714 | 0.001851852 | 0.013814217 | 0.008646167 | 5158 | tags=61%, list=24%, signal=47% | TAF11/TAF4/TAF7/TAF5L/TAF2/GTF2A2/TAF13/GTF2E1/TBP/GTF2H4/GTF2E2/STON1/GTF2H1/TBPL1/TAF5/GTF2H3/TAF4B/GTF2F2                                                                                                                                                                                                                                                           |
| KEGG_DNA_REPLICATION                              | 36 | -0.778539216 | -2.348458481 | 0.001851852 | 0.013814217 | 0.008646167 | 2845 | tags=72%, list=13%, signal=63% | RNASEH1/POLD1/PRIM2/RPA1/POLE3/POLD2/RPA3/RFC2/SSBP1/RPA4/MCM4/POLA1/POLE2/FEN1/RNASEH2A/RFC3/PRIM1/MCM6/MCM7/RFC5/MCM3/MCM2/PCNA/RFC4/DNA2                                                                                                                                                                                                                            |
| KEGG_SMALL_CELL_LUNG_CANCER                       | 84 | -0.563349751 | -1.92866877  | 0.001858736 | 0.013814217 | 0.008646167 | 3336 | tags=35%, list=16%, signal=29% | LAMC2/PIK3CA/TP53/BIRC3/PIK3CB/PTEN/ITGB1/PTK2/BCL2/SKP2/CHUK/AKT3/E2F3/ITGA6/LAMC1/CYCS/ITGAV/LAMA1/CCNE2/LAMB3/CKS1B/COL4A2/CDK4/PTGS2/COL4A1/MYC/FN1/LAMB1                                                                                                                                                                                                          |
| KEGG_ECM_RECEPTOR_INTERACTION                     | 82 | -0.657383035 | -2.247807435 | 0.001865672 | 0.013814217 | 0.008646167 | 879  | tags=26%, list=4%, signal=25%  | LAMC1/ITGAV/COL11A1/COL5A1/COL1A1/THBS2/LAMA1/COL6A3/LAMB3/IBSP/SDC2/COL4A2/COL1A2/HMMR/COL4A1/COL3A1/FN1/SPP1/COL5A2/LAMB1                                                                                                                                                                                                                                            |
| KEGG_RIBOSOME                                     | 81 | -0.52197189  | -1.780655911 | 0.001869159 | 0.013814217 | 0.008646167 | 5840 | tags=60%, list=27%, signal=44% | RPS10/RPL41/RPL23A/RPS15/RPS2/RPL14/RPL13A/UBA52/RPS4X/RPL10A/RPS8/RPS28/RPS3/FAU/RPL12/RPL19/RPS3A/RPL23/RPL30/RPS13/RPS19/RPS27A/RPS12/RPS23/RPS20/RPL35/RPL5/RPL24/RPL35A/RPS17/RPL7/RPL22/RPL4/RPL8/RPS5/RPL37A/RPS15A/RPLP0/RPL36/RPS7/RPS27L/RSL24D1/RPL31/RPS24/RPS21/RPL22L1/RPL26L1/MRPL13                                                                    |
| KEGG_NUCLEOTIDE_EXCISION_REPAIR                   | 43 | -0.591845465 | -1.853271775 | 0.001876173 | 0.013814217 | 0.008646167 | 4630 | tags=60%, list=22%, signal=47% | POLE/CCNH/LIG1/CUL4A/GTF2H5/CDK7/RAD23B/RBX1/RFC1/POLD1/GTF2H4/DDB2/GTF2H1/RPA1/POLE3/POLD2/RPA3/RFC2/RPA4/POLE2/GTF2H3/RFC3/RFC5/PCNA/RFC4                                                                                                                                                                                                                            |
| KEGG_MISMATCH_REPAIR                              | 22 | -0.752037876 | -2.029395919 | 0.001912046 | 0.013814217 | 0.008646167 | 2845 | tags=68%, list=13%, signal=59% | POLD1/RPA1/POLD2/RPA3/RFC2/SSBP1/RPA4/MSH6/RFC3/RFC5/MSH2/EXO1/PCNA/RFC4                                                                                                                                                                                                                                                                                               |
| KEGG_HOMOLOGOUS_RECOMBINATION                     | 26 | -0.696557159 | -1.959606827 | 0.001926782 | 0.013814217 | 0.008646167 | 2913 | tags=58%, list=14%, signal=50% | POLD1/BLM/RPA1/RAD50/POLD2/RPA3/RAD51/EME1/SSBP1/RPA4/NBN/RAD54L/RAD51C/RAD54B                                                                                                                                                                                                                                                                                         |
| KEGG_ASTHMA                                       | 27 | 0.648171175  | 1.810920818  | 0.002074689 | 0.013814217 | 0.008646167 | 3450 | tags=52%, list=16%, signal=44% | HLA-DMA/HLA-DMB/HLA-DRB1/TNF/HLA-DPB1/HLA-DOB/HLA-DQB1/FCER1A/HLA-DPA1/HLA-DRA/HLA-DOA/RNASE3/CD40LG/HLA-DRB4                                                                                                                                                                                                                                                          |
| KEGG_INTESTINAL_IMMUNE_NETWORK_FOR_IGA_PRODUCTION | 44 | 0.645745927  | 2.006385502  | 0.002150538 | 0.013814217 | 0.008646167 | 2738 | tags=50%, list=13%, signal=44% | PIGR/TNFRSF17/CXCL12/TNFRSF13C/HLA-DMA/HLA-DMB/AICDA/CCL28/HLA-DRB1/HLA-DPB1/ITGB7/HLA-DOB/HLA-DQB1/HLA-DPA1/ITGA4/HLA-DRA/TNFRSF13B/TNFSF13/IL2/HLA-DOA/CCL27/CD28                                                                                                                                                                                                    |
| KEGG_HEMATOPOIETIC_CELL_LINEAGE                   | 84 | 0.544230633  | 1.928947295  | 0.002155172 | 0.013814217 | 0.008646167 | 3279 | tags=45%, list=15%, signal=38% | MS4A1/CD19/CD1C/CD1D/IL1R2/CD55/CR2/CR1/CD22/CD3D/IL7R/HLA-DRB1/TNF/IL6R/CD37/CD2/CD59/ITGA4/FCER2/CD8A/IL4R/GP1BA/HLA-DRA/CD3G/FLT3LG/TP0/CSF1R/IL7/IL1R1/CD1E/CD38/CSF2RA/CD8B/CD3E/IL5RA/CD5/CD7/FLT3                                                                                                                                                               |

|                                                           |     |              |              |             |             |             |      |                                |                                                                                                                                                                                                                                                                                                                                                                                                                                                                                                                  |
|-----------------------------------------------------------|-----|--------------|--------------|-------------|-------------|-------------|------|--------------------------------|------------------------------------------------------------------------------------------------------------------------------------------------------------------------------------------------------------------------------------------------------------------------------------------------------------------------------------------------------------------------------------------------------------------------------------------------------------------------------------------------------------------|
| KEGG_B_CELL_RECEPTOR_SIGNALING_PATHWAY                    | 74  | 0.583146783  | 2.009818718  | 0.002164502 | 0.013814217 | 0.008646167 | 3054 | tags=45%, list=14%, signal=38% | CD19/CD72/CR2/BTK/PLCG2/FOS/PTPN6/CD79A/PRKCB/VAV1/LYN/CD22/CD79B/SYK/PIK3CD/CHP2/PPP3CA/CARD11/RAC2/BLNK/PIK3CG/INPP5D/RASGRP3/MAPK3/FCGR2B/PPP3CC/PIK3AP1/AKT1/CHP1/NFATC1/NFATC2/GRB2/NFAT5                                                                                                                                                                                                                                                                                                                   |
| KEGG_RETINOL_METABOLISM                                   | 48  | 0.580725057  | 1.832629649  | 0.002164502 | 0.013814217 | 0.008646167 | 2785 | tags=27%, list=13%, signal=24% | DHRS9/ALDH1A1/ADH1C/ADH7/CYP2C18/ADH1B/UGT2B28/RDH10/RDH12/CYP2A7/ADH1A/CYP2C8/ADH6                                                                                                                                                                                                                                                                                                                                                                                                                              |
| KEGG_DRUG_METABOLISM_CYTOCHROME_P450                      | 59  | 0.649869614  | 2.134587796  | 0.002192982 | 0.013814217 | 0.008646167 | 2785 | tags=41%, list=13%, signal=35% | GSTA1/ALDH3A1/ADH1C/GSTA3/ADH7/FMO2/CYP2E1/ALDH1A3/FMO3/MAOA/ALDH3B1/CYP2C18/ADH1B/ALDH3B2/UGT2B28/GSTK1/FMO5/GSTM1/CYP2A7/ADH1A/GSTO2/CYP2C8/MAOB/ADH6                                                                                                                                                                                                                                                                                                                                                          |
| KEGG_METABOLISM_OF_XENOBOTICS_BY_CYTOCHROME_P450          | 57  | 0.648976021  | 2.103887486  | 0.002207506 | 0.013814217 | 0.008646167 | 2785 | tags=39%, list=13%, signal=34% | GSTA1/ALDH3A1/AKR1C3/ADH1C/GSTA3/ADH7/CYP2E1/CYP2F1/ALDH1A3/CYP1B1/ALDH3B1/CYP2C18/ADH1B/ALDH3B2/EPHX1/UGT2B28/GSTK1/GSTM1/ADH1A/GSTO2/CYP2C8/ADH6                                                                                                                                                                                                                                                                                                                                                               |
| KEGG_LEUKOCYTE_TRANSENDOTHELIAL_MIGRATION                 | 113 | 0.498352227  | 1.855892058  | 0.002257336 | 0.013814217 | 0.008646167 | 3281 | tags=35%, list=15%, signal=29% | CLDN10/RHOH/NCF1/ITGAL/PLCG2/CXCL12/CLDN3/CLDN23/ITGB2/PRKCB/VAV1/CLDN8/MMP9/CLDN7/EZR/SIPA1/ITK/CYBA/NCF4/PIK3CD/CLDN11/RASSF5/JAM2/RAC2/PIK3CG/ITGA4/GNAI2/CLDN4/MYL12B/JAM3/CLDN9/TXK/RHOA/CD99/GNAI1/MYLPF/CYBB/PECAM1/CLDN15                                                                                                                                                                                                                                                                                |
| KEGG_CELL_ADHESION_MOLECULES_CAMS                         | 126 | 0.454653345  | 1.716117136  | 0.002314815 | 0.013814217 | 0.008646167 | 3336 | tags=40%, list=16%, signal=34% | CLDN10/SELL/ITGAL/PTPRC/ICAM3/CLDN3/HLA-DMA/CLDN23/HLA-DMB/ITGB2/CD22/CLDN8/CLDN7/HLA-E/HLA-DRB1/HLA-DPB1/ITGB7/HLA-DOB/HLA-DQB1/ALCAM/CLDN11/SELP/JAM2/CD2/HLA-DPA1/ITGA4/HLA-F/HLA-B/CD8A/HLA-DRA/HLA-G/ITGA8/CLDN4/SELPLG/GLG1/ITGA9/CDH3/JAM3/HLA-A/NRXN3/CLDN9/SDC1/HLA-DOA/CD28/HLA-C/CD99/CD8B/ICAM2/PECAM1/CLDN15/CD40LG                                                                                                                                                                                 |
| KEGG_NATURAL_KILLER_CELL_MEDIATED_CYTOTOXICITY            | 126 | 0.432408288  | 1.632151795  | 0.002314815 | 0.013814217 | 0.008646167 | 3190 | tags=33%, list=15%, signal=28% | ITGAL/PLCG2/PTPN6/ITGB2/PRKCB/VAV1/LCK/CD48/HLA-E/SYK/LAT/TNF/FYN/ZAP70/PIK3CD/CHP2/PPP3CA/RAC2/PIK3CG/HCSST/CD247/NCR3/HLA-B/SH2D1B/MAPK3/PPP3CC/HLA-G/SH2D1A/TNFRSF10D/IFNGR1/RAET1E/CHP1/HLA-A/LCP2/NFATC1/HLA-C/NFATC2/GRB2/NFAT5/ICAM2/IFNAR1                                                                                                                                                                                                                                                               |
| KEGG_GLYCOSYLPHOSPHATIDYLINOSITOL_GPI_ANCHOR_BIOSYNTHESIS | 24  | -0.635045047 | -1.752957552 | 0.003816794 | 0.02143809  | 0.013417866 | 4450 | tags=50%, list=21%, signal=40% | PIGP/PIGB/PIGK/PIGC/PIGU/PIGN/PIGX/PIGF/PIGW/PIGA/PGAP1                                                                                                                                                                                                                                                                                                                                                                                                                                                          |
| KEGG_PROTEIN_EXPORT                                       | 22  | -0.683203077 | -1.843643227 | 0.003824092 | 0.02143809  | 0.013417866 | 5643 | tags=82%, list=26%, signal=60% | SRP68/SPCS3/OXA1L/SEC61B/SRP54/SEC61A1/SPCS2/IMMP1L/HSPA5/SEC63/SRP19/SEC61A2/SRP72/SEC11A/IMMP2L/SRP9/SEC61G                                                                                                                                                                                                                                                                                                                                                                                                    |
| KEGG_LEISHMANIA_INFECTION                                 | 68  | 0.483172352  | 1.639465015  | 0.004310345 | 0.023453347 | 0.014679193 | 1741 | tags=29%, list=8%, signal=27%  | C3/NCF1/FOS/PTPN6/HLA-DMA/HLA-DMB/ITGB2/CR1/PRKCB/HLA-DRB1/TNF/HLA-DPB1/CYBA/HLA-DOB/HLA-DQB1/NCF4/HLA-DPA1/ITGA4/MAPK3/HLA-DRA                                                                                                                                                                                                                                                                                                                                                                                  |
| KEGG_T_CELL_RECEPTOR_SIGNALING_PATHWAY                    | 107 | 0.421656562  | 1.542489909  | 0.004716981 | 0.024932615 | 0.01560505  | 3580 | tags=38%, list=17%, signal=32% | PTPRC/FOS/PTPN6/VAV1/LCK/CD3D/LAT/TNF/FYN/ITK/ZAP70/PIK3CD/CHP2/MAP3K8/PPP3CA/CARD11/PIK3CG/CD247/CD8A/RASGRP1/MAPK3/CD3G/PPP3CC/AKT1/CHP1/LCP2/IL2/NFATC1/RHOA/CBL/PDPK1/CD28/NFATC2/CD8B/GRB2/CD3E/NFAT5/PAK6/CD40LG/PRKCQ/MAP3K14                                                                                                                                                                                                                                                                             |
| KEGG_HUNTINGTONS_DISEASE                                  | 158 | -0.426029245 | -1.626321532 | 0.005025126 | 0.025823562 | 0.016162685 | 5110 | tags=51%, list=24%, signal=39% | CLTC/TAF4/SP1/NDUFS1/PPID/HIP1/NDUFC2/SDHC/NDUFS4/NDUFB3/SDHB/CREB1/COX6A1/CASP3/BAX/NDUFB10/NDUFV2/AP2S1/NDUFA7/VDAC3/NDUFA1/SLC25A5/COX6B1/NDUFB6/POLR2G/NDUFV1/EP300/BBC3/POLR2F/UQCRB/UQCRQ/COX5B/COX5A/PLCB1/NDUFB5/DCTN4/TP53/BDNF/POLR2I/NDUFA6/COX7C/NDUFA5/NDUFB4/SOD2/COX7B/COX7A2L/SOD1/NDUFA4/TBP/NDUFV3/NDUFS2/COX7A2/NDUFS8/VDAC2/NDUFAB1/NDUFS6/HDAC1/COX6C/UQCRC2/POLR2B/TBPL1/AP2B1/CREB5/VDAC1/UQCRFS1/NDUFA8/TFAM/NDUFS5/POLR2K/CYCS/HDAC2/PLCB4/UQCRH/POLR2D/TAF4B/POLR2H/CYC1/NDUFB9/NDUFA9 |

|                                              |     |              |              |             |             |             |      |                                |                                                                                                                                                                                                                                                                                                                                                                                                             |
|----------------------------------------------|-----|--------------|--------------|-------------|-------------|-------------|------|--------------------------------|-------------------------------------------------------------------------------------------------------------------------------------------------------------------------------------------------------------------------------------------------------------------------------------------------------------------------------------------------------------------------------------------------------------|
| KEGG_ALZHEIMERS_DISEASE                      | 143 | -0.406785935 | -1.524797272 | 0.005190311 | 0.025951557 | 0.016242795 | 4735 | tags=44%, list=22%, signal=34% | SDHC/NDUFS4/NDUFB3/PSEN2/SDHB/ATP2A2/COX6A1/CASP3/ADAM17/NDUFB10/NDUFV2/GRIN2A/GSK3B/NDUFA7/NDUFA1/COX6B1/NDUFB6/RYR3/NDUFV1/ATF6/UQCRB/UQCRQ/COX5B/COX5A/PLCB1/CDK5/NDUFB5/NDUFA6/COX7C/NDUFA5/NDUFB4/APP/COX7B/COX7A2L/IL1B/NDUFA4/NDUFV3/NDUFS2/COX7A2/PPP3R1/NDUFS8/NDUFAB1/TNFRSF1A/NDUFS6/FAS/COX6C/UQCRC2/HSD17B10/NAE1/UQCRFS1/NDUFA8/NDUFS5/CYCS/BID/FADD/PLCB4/UQCRH/CYC1/NDUFB9/GAPDH/NDUFA9/LPL |
| KEGG_BLADDER_CANCER                          | 41  | -0.560088753 | -1.748742094 | 0.005504587 | 0.026798648 | 0.01677298  | 3363 | tags=29%, list=16%, signal=22% | TP53/TYMP/CDKN1A/MDM2/VEGFA/E2F3/NRAS/CDK4/CXCL8/MYC/MMP1                                                                                                                                                                                                                                                                                                                                                   |
| KEGG_STEROID_HORMONE_BIO SYNTHESIS           | 43  | 0.537092687  | 1.65891046   | 0.006396588 | 0.028479064 | 0.017824734 | 1528 | tags=23%, list=7%, signal=22%  | AKR1C3/SRD5A2/HSD17B2/CYP1B1/SULT1E1/SRD5A3/STS/SULT2B1/UGT2B28/HSD17B8                                                                                                                                                                                                                                                                                                                                     |
| KEGG_PRIMARY_IMMUNODEFICIENCY                | 35  | 0.561784346  | 1.649877206  | 0.006437768 | 0.028479064 | 0.017824734 | 1970 | tags=40%, list=9%, signal=36%  | CD19/BTK/PTPRC/TNFRSF13C/CD79A/LCK/AICDA/CD3D/IL7R/ZAP70/IL2RG/BLNK/CD8A/TNFRSF13B                                                                                                                                                                                                                                                                                                                          |
| KEGG_ALLOGRAFT_REJECTION                     | 34  | 0.587822588  | 1.723509041  | 0.006465517 | 0.028479064 | 0.017824734 | 3774 | tags=62%, list=18%, signal=51% | HLA-DMA/HLA-DMB/HLA-E/HLA-DRB1/TNF/HLA-DPB1/HLA-DOB/HLA-DQB1/HLA-DPA1/HLA-F/HLA-B/HLA-DRA/HLA-G/HLA-A/IL2/HLA-DOA/CD28/HLA-C/CD40LG/HLA-DRB4/IL12B                                                                                                                                                                                                                                                          |
| KEGG_GRAFT_VERSUS_HOST_DISEASE               | 34  | 0.580452918  | 1.701901001  | 0.006465517 | 0.028479064 | 0.017824734 | 2752 | tags=53%, list=13%, signal=46% | HLA-DMA/HLA-DMB/HLA-E/HLA-DRB1/TNF/HLA-DPB1/HLA-DOB/HLA-DQB1/HLA-DPA1/HLA-F/HLA-B/HLA-DRA/HLA-G/HLA-A/IL2/HLA-DOA/CD28/HLA-C                                                                                                                                                                                                                                                                                |
| KEGG_AUTOIMMUNE_THYROID_DISEASE              | 49  | 0.52094842   | 1.646002594  | 0.008695652 | 0.036963037 | 0.02313476  | 3450 | tags=41%, list=16%, signal=34% | HLA-DMA/HLA-DMB/HLA-E/HLA-DRB1/HLA-DPB1/HLA-DOB/HLA-DQB1/HLA-DPA1/HLA-F/HLA-B/HLA-DRA/HLA-G/TPO/HLA-A/IL2/HLA-DOA/CD28/HLA-C/CD40LG/HLA-DRB4                                                                                                                                                                                                                                                                |
| KEGG_FC_EPSILON_RI_SIGNALING_PATHWAY         | 75  | 0.45366536   | 1.566656921  | 0.008791209 | 0.036963037 | 0.02313476  | 1714 | tags=25%, list=8%, signal=23%  | BTK/PLCG2/PRKCB/PRKCD/VAV1/LYN/SYK/LAT/PLA2G10/TNF/FYN/PLA2G2D/PIK3CD/FCER1A/RAC2/PIK3CG/MAP2K3/INPP5D/MAPK3                                                                                                                                                                                                                                                                                                |
| KEGG_RNA_POLYMERASE                          | 29  | -0.614176806 | -1.768839316 | 0.009416196 | 0.037785948 | 0.023649811 | 3613 | tags=48%, list=17%, signal=40% | POLR2G/POLR2F/POLR3C/POLR2I/POLR3G/POLR3F/POLR1D/POLR2B/POLR1B/POLR2K/POLR1C/POLR2D/POLR2H                                                                                                                                                                                                                                                                                                                  |
| KEGG_SYSTEMIC_LUPUS_ERYTHEMATOSUS            | 105 | 0.407675295  | 1.486932916  | 0.009456265 | 0.037785948 | 0.023649811 | 2738 | tags=28%, list=13%, signal=24% | C3/HIST2H2BE/HLA-DMA/HLA-DMB/C7/H2AFJ/HLA-DRB1/TNF/HLA-DPB1/HLA-DOB/HLA-DQB1/C6/HIST1H2AE/HIST1H2BD/HLA-DPA1/HIST1H2BG/HIST1H2AC/HLA-DRA/FCGR2B/HIST1H2BC/C1R/H3F3A/HIST1H2AJ/C1S/HIST1H2AI/HLA-DOA/CTSG/C1QA/CD28                                                                                                                                                                                          |
| KEGG_GLYOXYLATE_AND_DICARBOXYLATE_METABOLISM | 16  | -0.675203727 | -1.690927482 | 0.009803922 | 0.037785948 | 0.023649811 | 4553 | tags=56%, list=21%, signal=44% | PGP/MTHFD2L/MDH2/MTHFD1L/GRHPR/MDH1/CS/MTHFD2                                                                                                                                                                                                                                                                                                                                                               |
| KEGG_ONE_CARBON_POOL_BY_FOLATE               | 16  | -0.679506372 | -1.701702688 | 0.009803922 | 0.037785948 | 0.023649811 | 2371 | tags=56%, list=11%, signal=50% | MTFMT/GART/MTHFD2/DHFR/MTR/ATIC/TYMS/SHMT2                                                                                                                                                                                                                                                                                                                                                                  |
| KEGG_BASE_EXCISION_REPAIR                    | 33  | -0.592109261 | -1.756576809 | 0.010928962 | 0.040838852 | 0.02556059  | 4845 | tags=58%, list=23%, signal=45% | POLD3/POLE/HMGB1/LIG1/SMUG1/PARP2/POLD1/PARP1/POLE3/POLD2/APEX1/TDG/NEIL3/POLE2/FEN1/NTHL1/UNG/PCNA                                                                                                                                                                                                                                                                                                         |
| KEGG_ARACHIDONIC_ACID_METABOLISM             | 52  | 0.489231285  | 1.547409276  | 0.011037528 | 0.040838852 | 0.02556059  | 2944 | tags=33%, list=14%, signal=28% | AKR1C3/PTGDS/GGT6/ALOX15/CYP2E1/GPX3/PLA2G10/GPX1/CYP2C18/PLA2G2D/CBR1/TBXAS1/CYP2U1/CYP2C8/HPGDS/ALOX5/ALOX12                                                                                                                                                                                                                                                                                              |
| KEGG_OXIDATIVE_PHOSPHORYLATION               | 100 | -0.440650783 | -1.566848635 | 0.012259194 | 0.044469627 | 0.027833052 | 5112 | tags=55%, list=24%, signal=42% | NDUFB2/ATP6V1E1/COX17/NDUFS1/NDUFA11/ATP6V1B2/NDUFC2/SDHC/NDUFS4/NDUFB3/SDHB/COX6A1/NDUFB10/ATP6V1E2/NDUFV2/PPA2/NDUFA7/NDUFA1/COX6B1/NDUFB6/ATP6V1C2/COX15/NDUFV1/COX10/UQCRB/UQCRQ/COX5B/COX5A/NDUFB5/NDUFA6/COX7C/NDUFA5/NDUFB4/COX7B/COX7A2L/NDUFA4/NDUFV3/NDUFS2/COX7A2/NDUFS8/NDUFAB1/ATP6V1C1/NDUFS6/COX6C/UQCRC2/UQCRFS1/NDUFA8/NDUFS5/COX11/UQCRH/CYC1/PPA1/NDUFB9/NDUFA9                          |
| KEGG_CALCIUM_SIGNALING_PATHWAY               | 174 | 0.35574996   | 1.406727564  | 0.012594458 | 0.044807208 | 0.028044341 | 4147 | tags=26%, list=19%, signal=21% | P2RX5/CALML5/OXTR/PLCG2/PRKCB/CALML3/CYSLTR1/GNAL/CHP2/GNA14/PPP3CA/ADR1/ADCY7/ITPR1/ATP2A3/PLCE1/PRKACB/PPP3CC/HTR5A/PLCB2/TNCC1/EDNRB/TRPC1/CHP1/CACNA1F/P2RX1/CD38/CAMK2D/TNCC2/CACNA1H/ITPR2/HRH1/ADRA1B/GNAQ/CHRM1/MYLK2/GNAS/HTR2B/ERBB2/CACNA1A/CAMK2A/ADCY2/CHRM5/P2RX7/PTK2B                                                                                                                       |
| KEGG_VIRAL_MYOCARDITIS                       | 67  | 0.468421662  | 1.579566323  | 0.013071895 | 0.045628314 | 0.028558262 | 3510 | tags=39%, list=16%, signal=33% | CD55/ITGAL/HLA-DMA/HLA-DMB/ITGB2/HLA-E/HLA-DRB1/FYN/HLA-DPB1/HLA-DOB/HLA-DQB1/RAC2/HLA-DPA1/HLA-F/HLA-B/HLA-DRA/HLA-G/MYH14/HLA-A/HLA-DOA/CD28/HLA-C/CD40LG/SGCA/HLA-DRB4/MYH13                                                                                                                                                                                                                             |

KEGG\_VALINE\_LEUCINE\_AND\_  
ISOLEUCINE BIOSYNTHESIS

11

-0.726070133 -1.654210401 0.014256619 0.048842121 0.030569749

2022 tags=45%, list=9%,  
signal=41%

PDHA1/IARS2/LARS/IARS

---
